## **Title**

Fidelity of parent-offspring transmission and the evolution of social behavior in structured populations

## **Author**

F. Débarre

**ORCID** 0000-0003-2497-833X

**Address** Centre Interdisciplinaire de Recherche en Biologie (CIRB)  
Collège de France  
CNRS UMR 7241 - Inserm U1050  
11, Place Marcelin Berthelot  
75231 Paris Cedex 05  
France

**email** [florence.debarre@normalesup.org](mailto:florence.debarre@normalesup.org)

**phone** +33 1 44 27 14 09

## **Length**

228 words in the abstract,  
4998 words in the main text,  
4 figures (color) [in the text + at the end],  
1 supplementary material (Appendix),  
1 zipped folder of scripts [uploaded on figshare,  
[https://figshare.com/articles/Mutation\\_and\\_social\\_evolution/3207748](https://figshare.com/articles/Mutation_and_social_evolution/3207748) ]

## Abstract

The theoretical investigation of how spatial structure affects the evolution of social behavior has mostly been done under the assumption that parent-offspring strategy transmission is perfect, *i.e.*, for genetically transmitted traits, that mutation is very weak or absent. Here, we investigate the evolution of social behavior in structured populations under arbitrary mutation probabilities. We consider populations of fixed size  $N$ , structured such that in the absence of selection, all individuals have the same probability of reproducing or dying (neutral reproductive values are the all same). Two types of individuals,  $A$  and  $B$ , corresponding to two types of social behavior, are competing; the fidelity of strategy transmission from parent to offspring is tuned by a parameter  $\mu$ . Social interactions have a direct effect on individual fecundities. Under the assumption of small phenotypic differences (weak selection), we provide a formula for the expected frequency of type  $A$  individuals in the population, and deduce conditions for the long-term success of one strategy against another. We then illustrate this result with three common life-cycles (Wright-Fisher, Moran Birth-Death and Moran Death-Birth), and specific population structures (graph-structured populations). Qualitatively, we find that some life-cycles (Moran Birth-Death, Wright-Fisher) prevent the evolution of altruistic behavior, confirming previous results obtained with perfect strategy transmission. We also show that computing the expected frequency of altruists on a regular graph may require knowing more than just the graph's size and degree.

## **Keywords**

mutation, relatedness, altruism, evolutionary graph theory

## 1 Introduction

2 Most models on the evolution of social behavior in structured populations study  
3 the outcome of competition between individuals having different strategies and  
4 assume that strategy transmission from parents to their offspring is almost per-  
5 fect (*i.e.*, when considering genetic transmission, that mutation is either vanish-  
6 ingly small or absent). This is for instance illustrated by the use of fixation prob-  
7 abilities to assess evolutionary success (*e.g.*, Nowak et al., 2004; Nowak, 2006;  
8 Ohtsuki et al., 2006). Yet, mutation has been shown to affect the evolutionary  
9 fate of social behavior (Frank, 1997; Tarnita et al., 2009) and is, more generally,  
10 a potentially important evolutionary force. Here, we explore the role of imper-  
11 fect strategy transmission—genetic or cultural—from parents to offspring on the  
12 evolution of social behavior, when two types of individuals, with different social  
13 strategies, are competing. We are interested in evaluating the long-term success  
14 of one strategy over another.

15 A population in which mutation is not close (or equal) to zero will spend a  
16 non-negligible time in mixed states (*i.e.*, in states where both types of individ-  
17 uals are present), so instead of fixation probabilities, we need to consider long-  
18 term frequencies to assess evolutionary success (Tarnita et al., 2009; Wakano &  
19 Lehmann, 2014; Tarnita & Taylor, 2014). We will say that a strategy is favored  
20 by selection when its expected frequency is larger than what it would be in the  
21 absence of selection.

22 In this study, we consider populations such that, in the absence of selection  
23 (when social interactions have no effect on fitness), all individuals have equal  
24 chances of reproducing, and equal chances of dying. In other words, in such a

25 population of size  $N$ , the neutral reproductive value of each site is  $1/N$  (Taylor,  
26 1990; Maciejewski, 2014; Tarnita & Taylor, 2014). We provide a formula that gives  
27 the long-term frequency of a social strategy in any such population, for arbitrary  
28 mutation rates, and for any life-cycle (provided population size remains equal  
29 to  $N$ ). This formula is a function of the probabilities that pairs of individuals  
30 are identical by descent. These probabilities are obtained by solving a linear  
31 system of equations, and we present explicit solutions for population structures  
32 with a high level of symmetry (structures that we call “n-dimensional graphs”).  
33 We finally illustrate our results with widely used updating rules (Moran models,  
34 Wright-Fisher model) and specific population structures.

## 35 **2 Models and Methods**

### 36 **Population structures**

37 We consider a population of fixed size  $N$ , where each individual inhabits a site  
38 corresponding to the node of a graph  $\mathcal{D}$ ; each site hosts exactly one individual.  
39 The edges of the graph,  $\{d_{ij}\}_{1 \leq i, j \leq N}$ , define where individuals can send their  
40 offspring to; we consider graphs  $\mathcal{D}$  that are connected, *i.e.*, such that following  
41 the edges of the graph, we can go from any node to any other node. Another  
42 graph,  $\mathcal{E}$ , with the same nodes as graph  $\mathcal{D}$  but with edges  $\{e_{ij}\}_{1 \leq i, j \leq N}$ , defines  
43 the social interactions between the individuals;  $\mathcal{E}$  can be the same graph as  $\mathcal{D}$ ,  
44 but does not have to be (Taylor et al., 2007a; Ohtsuki et al., 2007; Débarre et al.,  
45 2014). The edges of the two graphs can be weighted (*i.e.*,  $d_{ij}$  and  $e_{ij}$  can take  
46 any non-negative value) and directed (*i.e.*, we can have  $d_{ij} \neq d_{ji}$  or  $e_{ij} \neq e_{ji}$  for  
47 some sites  $i$  and  $j$ ). Finally, we denote by  $\mathbf{D}$  and  $\mathbf{E}$  the adjacency matrices of the

48 dispersal and interaction graphs, respectively.

49 **Regular dispersal graphs** In this study, we focus on dispersal graphs that are  
50 regular, *i.e.*, such that for all sites  $i$ , the sum of the edges to  $i$  and the sum of the  
51 edges from  $i$  are both equal to  $v$ :

$$\sum_{j=1}^N d_{ij} = \sum_{j=1}^N d_{ji} = v, \quad (1)$$

52 where  $v$  is called *degree* of the graph when the graph is unweighted. All the  
53 graphs depicted in the article satisfy eq. (1). Note that there is no specific con-  
54 straint on the interaction graph  $\mathcal{E}$ .

55 More detailed results are then obtained for regular graphs that display some  
56 level of symmetry, that we now describe:

57 **Transitive dispersal graphs** A transitive graph is such that for any two nodes  
58  $i$  and  $j$  of the graph, there is an isomorphism that maps  $i$  to  $j$  (Taylor et al.,  
59 2007a; ?); in other words, the graph looks the same from every node. In figure 1,  
60 graphs (b)–(e) are transitive.

61 **Transitive undirected dispersal graphs** A graph is undirected if for any  
62 two nodes  $i$  and  $j$ ,  $d_{ij} = d_{ji}$ . In figure 1, graphs (b), (c), (e) are both transitive  
63 and undirected.

64 **“ $n$ -dimensional” dispersal graphs** We call “ $n$ -dimensional graphs” tran-  
65 sitive graphs whose nodes can be relabelled with  $n$ -long indices, such that the  
66 graph is unchanged by circular permutation of the indices in each dimension.

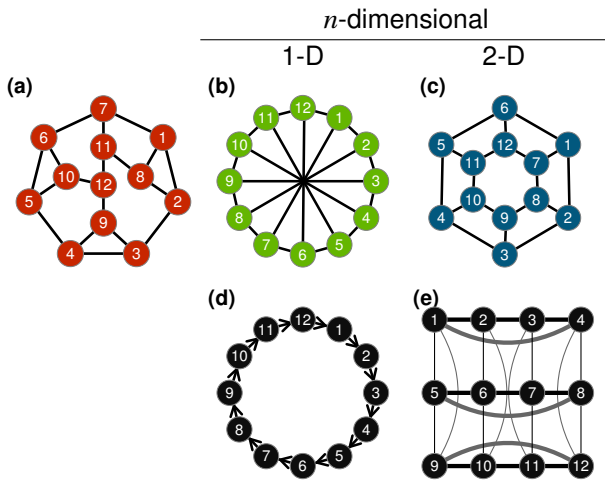

**Figure 1:** Examples of regular graphs of size 12. The graphs on the first line are unoriented and unweighted graphs of degree  $\nu = 3$ ; Graph (d) is oriented, graph (e) is weighted. (a) is the Frucht graph, and has no symmetry. Graphs (b) and (d) are one-dimensional, graphs (c) and (e) are two-dimensional (see main text).

67 The graphs can be directed and weighted. We denote by  $\mathcal{N}$  the ensemble of  
 68 node indices:  $\mathcal{N} = \{0, \dots, N_1 - 1\} \times \dots \times \{0, \dots, N_n - 1\}$ , with  $\prod_{k=1}^n N_k = N$ ; number-  
 69 ing is done modulo  $N_k$  in dimension  $k$ . Then for all indices  $i, j$  and  $l$  of  $\mathcal{N}$ , node  
 70 labelling is such that for all edges (modulo the size of each dimension),

$$d_{ij} = d_{i+k, j+k}. \quad (2)$$

71 In figure 1, graphs (b) and (d) are 1-dimensional: we can label their nodes such  
 72 that the adjacency matrices are circulant. Graphs (c) and (e) are 2-dimensional:  
 73 the adjacency matrices are block-circulant, with each block being circulant. In  
 74 1(c), one dimension corresponds to the angular position of a node ( $N_1 = 6$  posi-  
 75 tions), and the other dimension to the radial position of a node ( $N_2 = 2$  positions,

76 inner or outer hexagon). In 2(e), one dimension corresponds to the horizontal  
77 position of a node ( $N_1 = 4$  positions) and the other to the vertical position of a  
78 node ( $N_2 = 3$  positions). Condition eq. (2) may sound strong, but is satisfied for  
79 the regular population structures classically studied, like stepping-stones (*e.g.*,  
80 cycle graphs, lattices), or island models (Taylor, 2010; Taylor et al., 2011).

## 81 **Types of individuals and social interactions**

82 There are two types ( $A$  and  $B$ ) of individuals in the population, corresponding to  
83 two strategies of social behavior. There are no mixed strategies: an individual of  
84 type  $A$  plays strategy  $A$ , and individuals do not change strategies. The indicator  
85 variable  $X_i$  represents the type of the individual present at site  $i$ :  $X_i$  is equal to 1  
86 if the individual at site  $i$  is of type  $A$ , and  $X_i$  is equal to 0 otherwise ( $X_i = \mathbb{1}_A(i)$ ).  
87 A  $N$ -long vector  $X$  gathers the identities of all individuals in the population, and  
88  $\bar{X}$  is the population average of  $X$  ( $\bar{X} = \sum_{i=1}^N X_i / N$ ).

89 Individuals in the population reproduce asexually. Fecundities are affected  
90 by social interactions, and are gathered in a  $N$ -long vector  $f$ . We assume that  
91 the genotype-phenotype map is such that the two types  $A$  and  $B$  are close in  
92 phenotype space: the individual living at site  $i$  expresses a phenotype  $\delta X_i$ , with  
93  $\delta \ll 1$  (a feature called “ $\delta$ -weak selection” by Wild & Traulsen (2007)).

94 An individual's fecundity depends on its own phenotype and on its interac-  
95 tion neighborhood. Interaction neighborhoods are determined by the interac-  
96 tion graph  $\mathcal{E}$ , and the effect of social interactions on fecundity are given by a



97 function  $\phi$ . We assume that the baseline fecundity is  $\phi(0, 0) = 1$ , so that

$$\begin{aligned} f_i(X, \delta) &= \phi\left(\delta X_i, \sum_l e_{li} \delta X_l\right) \\ &= 1 + \delta \left( X_i \partial_{(1)} \phi(0, 0) + \sum_l e_{li} X_l \partial_{(2)} \phi(0, 0) \right) + O(\delta^2), \end{aligned} \quad (3a)$$

98 where  $\partial_{(n)} \phi(0, 0)$  represents the partial derivative of  $\phi$  with respect to its  $n^{\text{th}}$  ele-  
 99 ment, evaluated at  $(0, 0)$ , and  $\sum_l$  refers to the sum  $\sum_{l=1}^N$ . If we write  $b = \partial_{(2)} \phi(0, 0)$   
 100 and  $-c = \partial_{(1)} \phi(0, 0)$ , then eq. (3a) becomes

$$f_i(X, \delta) = 1 + \delta \left( -c X_i + b \sum_l e_{li} X_l \right) + O(\delta^2). \quad (3b)$$

101 Our results are valid for any  $b$  and  $c$ , but throughout the article, we will consider  
 102 the case where  $b > 0$  and  $c > 0$ , so that type-A individuals are “altruists”, and  
 103 we will seek to understand the impact of imperfect strategy transmission on the  
 104 frequency of altruists. When  $\delta = 0$ , all individuals in the population, whichever  
 105 their type, have the same fecundity: the trait is then neutral.

## 106 **Reproduction and mutation**

107 The expected number of successful offspring established at site  $j$  at the next  
 108 time step, descending from the individual who is living at site  $i$  at the current  
 109 time step, is denoted by  $B_{ji}(f(X, \delta))$ , written  $B_{ji}$  for simplicity. “Successful off-  
 110 spring” of a focal individual means individuals who descend from this focal in-  
 111 dividual and who are alive and established at the start of the next time step.  
 112 Because there is exactly one individual per site,  $0 \leq B_{ji} \leq 1$ . Mutation among  
 113 offspring occurs with probability  $\mu$ ,  $0 < \mu \leq 1$ ; when mutation occurs, the off-

114 spring are of type  $A$  with probability  $p$  and of type  $B$  otherwise ( $0 < p < 1$ ). For  
115 instance, under this mutation scheme, the offspring of an individual of type  $A$   
116 is also of type  $A$  with probability  $1 - \mu + \mu p$  (Taylor et al., 2007b; Nowak et al.,  
117 2010; Tarnita & Taylor, 2014). The parameter  $p$  controls the asymmetry of muta-  
118 tion, and it is also the expected frequency of type- $A$  individuals in the absence  
119 of selection (*i.e.*, when  $\delta = 0$ ). Although we use the word “mutation”, which hints  
120 at a genetic transmission of the trait, this framework can also describe vertical  
121 cultural transmission, so  $\mu$  does not have to be small. The mutation probability,  
122 however, cannot be zero; if it were, the all- $A$  and all- $B$  states would be absorb-  
123 ing: we would end up either with only type- $A$  or only type- $B$  individuals in the  
124 population, and we would not be able to define a stationary distribution of pop-  
125 ulation states—for similar reasons,  $p$  cannot be 0 nor 1.

126 We denote by  $D_i(f(X, \delta))$  (or  $D_i$  for simplicity) the probability that the indi-  
127 vidual living at site  $i$  is dead at the beginning of the next time step, given that the  
128 population is currently in state  $X$ . This probability of death at site  $i$  can be ex-  
129 pressed as a function of the probabilities of birth and establishment of offspring  
130 at site  $i$ , summing over the locations  $j$  of the potential parents:

$$D_i = \sum_{j=1}^N B_{ij}. \quad (4)$$

131 There is exactly one individual per site, so at a given site  $i$ , there can be at most  
132 one successfully established offspring at each time step, and  $0 \leq D_i \leq 1$ . On the  
133 other hand, the expected number of offspring of the parent currently living at

134 site  $i$  is  $0 \leq \sum_{j=1}^N B_{ji} \leq N$ . We denote by

$$W_i = \sum_{j=1}^N B_{ji} + (1 - D_i) \quad (5)$$

135 the expected contribution to the next time step of the individual living in site  $j$ :  
136 this includes this individual's successful offspring, and the individual itself if it  
137 survived—a quantity that we can also refer to as “fitness”.

138 Finally, we are considering population structures such that in the absence of  
139 selection ( $\delta = 0$ ), all individuals have the same probability of reproducing, and  
140 all individuals have the same probability of dying—meaning that all sites in the  
141 population have the same reproductive value  $1/N$  (Taylor, 1990; Caswell, 2001;  
142 Maciejewski, 2014); this implies that for all sites  $i$

$$\sum_{j=1}^N B_{ji}(f(X, 0)) = B^* = D_i(f(X, 0)). \quad (6)$$

## 143 **Life-cycles**

144 Most of our results are derived without specifying a life-cycle (also called “up-  
145 dating rule”). In the *Illustrations* section, we will give specific examples using  
146 classical life-cycles: Moran models (Birth-Death and Death-Birth), with exactly  
147 one birth and one death during a time step, and the Wright-Fisher model, where  
148 all adults die and are replaced by new individuals at the end of a time step.

### 149 **3 Results**

#### 150 **Expected frequency of type-*A* individuals in the population**

151 We describe here the key steps of the computation of the expected frequency  
152 of type-*A* individuals in the population and refer the reader to Appendix A for  
153 mathematical details.

154 The expected frequency of type-*A* individuals in the population, denoted by  
155  $\mathbb{E}[\bar{X}]$ , can be computed from the stationary distribution of population states,  
156 considering what happens during one during step. We denote by  $\Omega$  the set of  
157 all possible states of the population and by  $\xi(X, \delta, \mu)$  the probability that the  
158 population is in state  $X$ , in a model with strength of selection (phenotype dif-  
159 ferences)  $\delta$  and mutation probability  $\mu$  ( $\xi$  is the stationary distribution of pop-  
160 ulation states). Given state  $X$  of the population, at the end of the time step, the  
161 state of the individual living at site  $i$  depends on whether it has survived dur-  
162 ing the time step (first term within the brackets of eq. (7)), and, if it has been  
163 replaced, on the type of the newly established offspring (second term within the  
164 brackets); we then take the expectation over all population states, and obtain:

$$\mathbb{E}[\bar{X}] = \sum_{X \in \Omega} \frac{1}{N} \sum_{i=1}^N \left[ (1 - D_i) X_i + \sum_{j=1}^N B_{ij} (X_j (1 - \mu) + \mu p) \right] \xi(X, \delta, \mu). \quad (7)$$

165 This is the expected frequency of type-*A* individuals in the population. For in-  
166 stance, if we run a simulation of the model for a very long time, the average over  
167 time of the frequency of type-*A* individuals will provide an estimation of  $\mathbb{E}[\bar{X}]$ ;  
168 this quantity does not depend on the initial state of the population.

169 We then assume that selection is weak, *i.e.*,  $\delta$  is small, and write a first-order

170 expansion of eq. (7) that contains derivatives of  $\xi$ ,  $D_i$  and  $B_{ij}$  with respect to  $\delta$ .  
 171 For the last two, we further use the chain rule with the variables  $f_k$ , which rep-  
 172 resent the fecundity of the individual living at site  $k$ . In doing so, we let appear  
 173 quantities that are the expectations of the state of pairs of sites when no selec-  
 174 tion is acting (*i.e.*, when  $\delta = 0$ ; we call these “neutral expectations” and  $\xi(X, 0, \mu)$   
 175 is called neutral stationary distribution):

$$P_{jk} = \sum_{X \in \Omega} X_j X_k \xi(X, 0, \mu) = \mathbb{E}_0[X_j X_k]. \quad (8)$$

176 The fact that these neutral expectations appear in our equations does not  
 177 mean that selection is initially not acting and then “turned on”: selection is act-  
 178 ing all the time, but it is weak because phenotypic differences are small ( $\delta \ll 1$ ).  
 179 At the first order in  $\delta$ , we can ignore the effect of selection on the expected state  
 180 of pairs of sites, and this is why we only need neutral expectations (eq. (8)).

181 Eventually, we deduce that the expected frequency of individuals of type  $A$   
 182 in the population can be written as

$$\mathbb{E}[\bar{X}] \approx p + \frac{\delta}{\mu B^*} \left( \frac{\beta b - \gamma c}{N} \right), \quad (9)$$

183 with

$$\beta = \sum_{j,k,l} \left( \sum_i (1 - \mu) \partial_{f_k} B_{ij} - \partial_{f_k} D_j \right) e_{lk} P_{jl} + \mu \sum_{i,j,k,l} \partial_{f_k} B_{ij} e_{lk} p^2, \quad (10a)$$

$$\gamma = \sum_{j,k} \left( \sum_i (1 - \mu) \partial_{f_k} B_{ij} - \partial_{f_k} D_j \right) P_{jk} + \mu \sum_{i,j,k} \partial_{f_k} B_{ij} p^2, \quad (10b)$$

184 with  $P$  as defined in eq. (8) and  $\partial_{f_k}$  being a shorthand notation for  $\left. \frac{\partial}{\partial f_k} \right|_{\delta=0}$ . Eq. (9)

185 is an approximation at the first order in  $\delta$  (we neglect terms in  $\delta^2$  and higher). A  
186 weak mutation approximation of eq. (9) is presented in Appendix A.4.

187 The formulas for  $\beta$  and  $\gamma$  (eq. (10a)-eq. (10b)) are still implicit, because we  
188 need to evaluate the  $P_{ij}$  terms, which we now do.

### 189 **Expected state of pairs of sites at neutrality**

190 We recall that  $P_{ij}$ , defined in eq. (8), is also the probability that both sites  $i$  and  $j$   
191 are occupied by individuals of type  $A$ , at neutrality (*i.e.*, when  $\delta = 0$ ). Under van-  
192 ishing mutation ( $\mu \rightarrow 0$ ), convenient connections can be made between identity  
193 in state and identity-by-descent (Cockerham & Weir, 1993; Rousset et al., 2000),  
194 and then with coalescence times (Slatkin, 1991, 1993; Rousset, 2004; Allen et al.,  
195 2012). Here as well, we can characterize  $P_{ij}$  in terms of probabilities of identity-  
196 by-descent,  $Q_{ij}$ . Two individuals at sites  $i$  and  $j$  are said to be identical by de-  
197 scent (IBD) if they share a common ancestor and if no mutation occurred in  
198 their lineages since this common ancestor (Kimura & Crow, 1964, note though  
199 that the original definition is with an infinite allele model, where each mutation  
200 creates a new allele). If two individuals are IBD, then they are both of type  $A$   
201 with probability  $p$ , the expected state of a single individual at neutrality. If two  
202 individuals are not IBD, then they are both of type  $A$  with probability  $p^2$ . Sim-  
203 plifying, we obtain

$$P_{ij} = p^2 + Q_{ij} p(1 - p) \quad (11)$$

204 (Allen & Nowak, 2014) (see Appendix B.1 for more details). Eq. (11) also valid  
205 when  $i = j$ . So we can work with IBD relationships.

206 To find the probabilities of identity-by-descent, we first write the probability

207 that two individuals at sites  $i$  and  $j$  are IBD given the state  $X$  of the population at  
208 the previous time step, and then take the expectation of this conditional prob-  
209 ability. We can still do so without specifying the way the population is updated  
210 (using notation as in Allen et al. (2015)), and the resulting equation is presented  
211 in Appendix B.1, eq. (B.1). This equation can also be adapted to specific up-  
212 dating rules, as shown in the *Illustrations* section (details of the calculations are  
213 provided in Appendix B).

214 Keeping in mind that  $Q_{ij} = Q_{ji}$  and that  $Q_{ii} = 1$ , we then have to solve a  
215 linear system of  $N(N-1)/2$  equations to obtain explicit formulas for all the  $Q_{ij}$   
216 terms, for any regular graph. More explicit formulas for  $Q_{ij}$  can be found for  
217 regular graphs, and in particular for  $n$ -dimensional graphs, as we will see in the  
218 *Illustrations* section. Finally, we can gather all probabilities of identity by de-  
219 scent in a matrix  $\mathbf{Q}$ .

## 220 **Back to the expected frequency of type- $A$ individuals**

221 Using the relationship between the expected state of pairs of sites  $P_{ij}$  and prob-  
222 abilities of identity-by-descent  $Q_{ij}$  (eq. (11)), we can rewrite eq. (9) as follows:

223

$$\mathbb{E}[\bar{X}] \approx p + \delta \frac{p(1-p)}{\mu B^* N} \left[ b \left( \sum_{j,k,l} e_{kl} \partial_{f_l} W_j Q_{jk} \right) - c \left( \sum_{j,k} \partial_{f_k} W_j Q_{jk} \right) \right], \quad (12)$$

224 where as before  $\partial_{f_k}$  is a shorthand notation for  $\frac{\partial}{\partial f_k} \Big|_{\delta=0}$ ;  $W_j$ , the fitness of indi-  
225 vidual  $j$ , was defined in eq. (5).

226 **Interpretation** For each focal individual at site  $k$ , we consider the influence  
227 that this individual can have on an identical-by-descent individual at site  $j$  ( $Q_{jk}$ ).

228 The focal  $k$  can directly provide a benefit to  $j$  ( $b e_{kj}$ ) and hence affect  $j$ 's fitness  
229 ( $\partial_{f_j} W_j$ ), but  $k$  can also provide a benefit to another individual  $l$  ( $b e_{kl}$ ), and the  
230 resulting change of  $l$ 's fecundity affects  $j$ 's fitness ( $\partial_{f_l} W_j$ ). By paying the cost of  
231 being of type  $A$  ( $c$ ),  $k$  affects its own fitness ( $\partial_{f_k} W_k$ ) but also indirectly the fitness  
232 of  $j$  ( $\partial_{f_k} W_j$ ).

233 **Structure parameter** We say that a strategy is favored if its frequency at the  
234 mutation-selection-drift equilibrium is higher than what it would be in the ab-  
235 sence of selection. For type  $A$ , this translates into  $\mathbb{E}[\bar{X}] > p$ . With eq. (12), this  
236 condition becomes

$$\frac{\sum_{j,k,l} e_{kl} \partial_{f_l} W_j Q_{jk}}{\underbrace{\sum_{j,k} \partial_{f_k} W_j Q_{jk}}_{\kappa}} b - c > 0. \quad (13)$$

237 Hence, a single parameter,  $\kappa$ , summarizes, for a given life-cycle, the structure  
238 of the population and the effect of mutation (Tarnita et al., 2009; Taylor & Ma-  
239 ciejewski, 2012);  $\kappa$  is interpreted as a scaled coefficient of relatedness, that in-  
240 cludes the effect of competition (Lehmann & Rousset, 2010).

## 241 4 Illustrations

### 242 Updating rules

243 The results presented so far were valid for any updating rule, provided it is such  
244 that population size remains equal to  $N$ . We now express the expected frequency  
245 of type- $A$  individuals for specific updating rules, commonly used in studies on  
246 the evolution of altruistic behavior in structured populations: the Moran model  
247 and the Wright-Fisher model. Under a Moran model (Moran, 1962), exactly one



248 individual dies and one individual reproduces during one time step; hence, at  
 249 neutrality,  $B^* = 1/N$  ( $B^*$  was defined in eq. (6)). The order of the two events  
 250 matters, so two updating rules are distinguished (Ohtsuki & Nowak, 2006; Oht-  
 251 suki et al., 2006): Birth-Death and Death-Birth. In both cases, payoffs are com-  
 252 puted at the start of each time step, before anything happens.

### 253 **Moran model, Birth-Death**

254 **Any regular graph** Under a Birth-Death (BD) updating, an individual  $j$  is cho-  
 255 sen to reproduce with a probability equal to its relative fecundity in the popula-  
 256 tion ( $f_j / \sum_l f_l$ ); then its offspring disperses at random along the  $\mathcal{D}$  graph, and so  
 257 displaces another individual  $i$  with a probability  $d_{ji}/\nu$ , so that

$$B_{ij} = \frac{f_j}{\sum_l f_l} \frac{d_{ji}}{\nu}, \text{ and } D_j = \sum_{i=1}^N B_{ji} = \frac{\sum_i f_i d_{ij}}{\nu \sum_l f_l}. \quad (14)$$

258 Note that with this updating rule, the probability of dying  $D_j$  depends on the  
 259 composition of the population. With these probabilities of reproducing and dy-  
 260 ing eq. (12) becomes, using the matrix notation,

$$\mathbb{E}[\bar{X}] \approx p + \delta \frac{p(1-p)}{\mu} \left[ b \left( \frac{1}{N} \text{Tr}(\mathbf{E} \cdot \mathbf{Q}) - \frac{1}{N\nu} \text{Tr}(\mathbf{E} \cdot \mathbf{D} \cdot \mathbf{Q}) \right) - c \left( 1 - \frac{1}{N\nu} \text{Tr}(\mathbf{D} \cdot \mathbf{Q}) \right) \right], \quad (15)$$

261 where  $\text{Tr}(\mathbf{M})$  denotes the trace of a matrix  $\mathbf{M}$ , *i.e.*, the sum of its diagonal ele-  
 262 ments. The factors of the benefits  $b$  and costs  $c$  contain direct (first terms) and  
 263 indirect (second terms) effects. The term  $\text{Tr}(\mathbf{E} \cdot \mathbf{Q}) / N$ , associated to direct effects  
 264 of a benefit  $b$ , is the average probability of identity by descent with a social inter-  
 265 actant. It is discounted by the indirect effects  $\text{Tr}(\mathbf{E} \cdot \mathbf{D} \cdot \mathbf{Q}) / (N\nu)$ , corresponding

266 to the effects of a change in fecundity of competitors; with this updating rule,  
267 competitors are one dispersal step away. Under a Birth-Death updating rule in-  
268 deed, the survival of an individual at site  $k$  is reduced if another individual  $j$   
269 sends its offspring to site  $k$ , an event that occurs if the two are neighbors on  
270 the dispersal graph ( $d_{jk}$ ). So the competition neighborhood is determined by  $\mathbf{D}$   
271 (Grafen & Archetti, 2008). Similarly, the direct cost of a social interaction is dis-  
272 counted by the effects on competitors ( $\text{Tr}(\mathbf{D} \cdot \mathbf{Q}) / (Nv)$ ). We can further note that  
273 for all dispersal graphs,  $1 - \frac{1}{Nv} \text{Tr}(\mathbf{D} \cdot \mathbf{Q}) \geq 0$ , *i.e.*, that costs are always costly. We  
274 will see below that benefits are not always beneficial (b's factor can be negative).

275 **Probabilities of identity by descent** With this updating rule, the probabil-  
276 ities of identity by descent satisfy, for any  $i$  and  $j \neq i$ ,

$$Q_{ij} = \frac{1}{2v} \sum_k (d_{kj} Q_{ki} + d_{ki} Q_{kj}). \quad (16)$$

277 (see Appendix B.2 for details on the derivation). For generic regular graphs, we  
278 have to solve a system of  $N(N-1)/2$  equations to find the probabilities of iden-  
279 tity by descent.

280 **Transitive undirected graphs** When the graph is transitive and undirected,  
281 probabilities of identity by descent verify

$$\mathbf{Q} = \lambda_M \left( \mathbf{I}_N - \frac{1-\mu}{v} \mathbf{D} \right)^{-1}, \quad (17)$$

282 where  $\mathbf{I}_N$  is the identity matrix, and  $\lambda_M$  is such that  $Q_{i,i} = 1$  for all  $i$  (the  $M$  index  
283 stands for “Moran”). In addition, we have  $0 \leq \lambda_M \leq 1$ . With eq. (17), eq. (15)

284 simplifies into

$$\mathbb{E}[\bar{X}] \approx p + \delta \frac{p(1-p)}{\mu} \left[ b \left( \frac{-\mu}{1-\mu} \frac{\text{Tr}(\mathbf{E} \cdot \mathbf{Q})}{N} + \frac{\lambda_M}{1-\mu} \frac{\text{Tr}(\mathbf{E})}{N} \right) - c \left( 1 - \frac{1-\lambda_M}{1-\mu} \right) \right]. \quad (18)$$

285 The term  $\text{Tr}(\mathbf{E})/N$  corresponds to social interactions with oneself; it is usually  
286 considered as null in the case of pairwise interactions, but is not for common  
287 good type of interactions (when benefits are pooled and then redistributed). So  
288 unless interactions with oneself are strong (large  $\text{Tr}(\mathbf{E})/N$ ), the factor modulat-  
289 ing the effect of benefits  $b$  is negative, and as a result the expected frequency of  
290 altruists cannot be greater than what it would be in the absence of selection (*i.e.*,  
291  $\mathbb{E}[\bar{X}] \leq p$ .)

292 Evaluating probabilities of identity by descent in transitive regular graphs  
293 still requires the inversion of a  $N$  by  $N$  matrix (eq. (17)), which can limit applica-  
294 tions. Results are simpler in graphs that match our definition of “ $n$ -dimensional  
295 graphs”; they depend on the dimensionality  $n$  of the graph and are presented in  
296 Appendix B.2.

### 297 **Moral model, Death-Birth**

298 **Any regular graph** Under a Death-Birth (DB) updating, the individual who is  
299 going to die is chosen first, uniformly at random ( $i$  is chosen with probability  
300  $1/N$ ). Then, all individuals produce offspring, and one of them (one offspring of  
301 parent  $j$  wins with probability  $f_j d_{ji} / \sum_l f_l d_{li}$ ) displaces the individual chosen  
302 to die. When  $d_{ii} \neq 0$ , one needs to clarify whether the individual chosen to die  
303 reproduces before dying or not; here we assume that this is the case, but some

304 alternative formulations do not. Under this updating rule, we have

$$D_j = \frac{1}{N}, \text{ and } B_{ij} = \frac{1}{N} \frac{f_j d_{ji}}{\sum_l f_l d_{li}}. \quad (19)$$

305 Using matrix notation, eq. (12) becomes

$$\mathbb{E}[\bar{X}] \approx p + \delta \frac{p(1-p)}{\mu} \left[ b \left( \frac{1}{N} \text{Tr}(\mathbf{E} \cdot \mathbf{Q}) - \frac{1}{Nv^2} \text{Tr}(\mathbf{E} \cdot \mathbf{D} \cdot \mathbf{D}^T \cdot \mathbf{Q}) \right) - c \left( 1 - \frac{1}{Nv^2} \text{Tr}(\mathbf{D} \cdot \mathbf{D}^T \cdot \mathbf{Q}) \right) \right], \quad (20)$$

306 where  $T$  denotes transposition. We can again identify direct and indirect effects  
 307 of benefits and costs; the direct effects are the same as for the Birth-Death up-  
 308 dating rule, but the indirect effects differ, reflecting the fact that competitors are  
 309 now two dispersal steps away (Grafen & Archetti, 2008; Débarre et al., 2014). Un-  
 310 der a Death-Birth updating rule indeed, individuals  $j$  and  $k$  are competing for  
 311 a site  $i$  whose occupant has just been chosen to die if both  $j$  and  $k$  can send  
 312 their offspring to  $i$ ; this depends on  $d_{ji}d_{ki}$ , leading to the  $\mathbf{D} \cdot \mathbf{D}^T$  products in  
 313 eq. (20). Again, we can also note that  $1 - \frac{1}{Nv^2} \text{Tr}(\mathbf{D} \cdot \mathbf{D}^T \cdot \mathbf{Q}) \geq 0$ , *i.e.*, that the costs  
 314 are indeed costly.

315 **Probabilities of identity by descent** With the Death-Birth model as de-  
 316 fined above, the system of equations for the probabilities of identity by descent  
 317 at neutrality is the same as in eq. (16).

318 **Transitive undirected graphs** When the graph is transitive and undirected,  
 319 eq. (17) still holds and eq. (20) simplifies into

$$\mathbb{E}[\bar{X}] \approx p + \delta \frac{p(1-p)}{\mu} \left[ b \left( \left( \frac{-\mu(2-\mu)}{(1-\mu)^2} \right) \frac{\text{Tr}(\mathbf{E} \cdot \mathbf{Q})}{N} + \frac{\lambda_M}{1-\mu} \frac{\text{Tr}(\mathbf{E} \cdot \mathbf{D})}{N\nu} + \frac{\lambda_M}{(1-\mu)^2} \frac{\text{Tr}(\mathbf{E})}{N} \right) - c \left( \frac{-\mu(2-\mu)}{(1-\mu)^2} + \frac{\lambda_M}{1-\mu} \frac{\text{Tr}(\mathbf{D})}{N\nu} + \frac{\lambda_M}{(1-\mu)^2} \right) \right]. \quad (21)$$

### 320 **Wright-Fisher**

321 Under a Wright-Fisher model, generations are non-overlapping: all adults pro-  
 322 duce offspring, then all adults die and the offspring disperse and compete for  
 323 establishment, so that

$$D_j = 1, \text{ and } B_{ij} = \frac{f_j d_{ji}}{\sum_l f_l d_{li}}. \quad (22)$$

324 In a Wright-Fisher model, at neutrality,  $B^* = 1$  (the entire population is renewed  
 325 at each generation; in a Moran model we had  $B^* = 1/N$ ); eq. (22) differing from  
 326 its Moran Death-Birth equivalent (eq. (19)) by only a factor  $1/N$ , we end up with  
 327 the same equation as eq. (20) for the expected frequency of type-*A* individuals  
 328 in the population. The difference between the Moran Death-Birth and Wright-  
 329 Fisher life-cycles however lies in the evaluation of probabilities of identity by  
 330 descent.

331 **Probabilities of identity by descent** Under a Wright-Fisher model, the en-  
 332 tire population is replaced, so the equation is different from the one obtained  
 333 under a Moran model; probabilities of identity by descent of two different indi-

334 individuals satisfy ( $i \neq j$ )

$$Q_{ij} = (1 - \mu)^2 \sum_{k,l} \frac{d_{ki}}{v} \frac{d_{lj}}{v} Q_{kl}. \quad (23)$$

335 (see Appendix B.3 for details of the derivation.)

336 **Undirected transitive graphs** When the dispersal graph is undirected ( $\mathbf{D} =$   
337  $\mathbf{D}^T$ ) and transitive, the probabilities of identity by descent verify

$$\mathbf{Q} = \lambda_{WF} \left( \mathbf{I}_N - \frac{(1 - \mu)^2}{v^2} \mathbf{D}\mathbf{D} \right)^{-1}, \quad (24)$$

338 with  $\lambda_{WF}$  such that for all  $i$ ,  $Q_{ii} = 1$ , and the  $_{WF}$  index stands for “Wright-Fisher”.

339 With this, the expected frequency of type- $A$  individuals becomes

$$\mathbb{E}[\bar{X}] \approx p + \delta \frac{p(1-p)}{\mu} \left[ b \left( \frac{-\mu(2-\mu)}{(1-\mu)^2} \frac{\text{Tr}(\mathbf{E} \cdot \mathbf{Q})}{N} + \frac{\lambda_{WF}}{(1-\mu)^2} \frac{\text{Tr}(\mathbf{E})}{N} \right) - c \left( \frac{-\mu(2-\mu)}{(1-\mu)^2} + \frac{\lambda_{WF}}{(1-\mu)^2} \right) \right]. \quad (25)$$

340 We can immediately see the difference with the Moran Death-Birth case (eq. (21)),  
341 caused by a different equation for the probabilities of identity by descent  $\mathbf{Q}$ . Cru-  
342 cially missing in eq. (25) is the positive term  $\frac{\lambda_M}{1-\mu} \frac{\text{Tr}(\mathbf{E} \cdot \mathbf{D})}{Nv}$ : without it, the factor as-  
343 sociated to the benefits  $b$  is negative unless interactions with oneself ( $\text{Tr}(\mathbf{E})$ ) are  
344 strong enough, as was the case with the Moran Birth-Death updating.

345 As for the Moran model, evaluating probabilities of identity by descent in  
346 undirected transitive graphs (eq. (24)) involves the computation of the inverse  
347 of a  $N$  by  $N$  matrix. More explicit results can be obtained for “ $n$ -dimensional  
348 graphs”; they are presented in Appendix B.3.

349 **Specific population structures**

350 All numerical examples given in this section are derived with  $b > 0$  and  $c > 0$ , so  
 351 type-*A* individuals can be called altruists.

352 As an illustration, we explore the impact of mutation on the expected pro-  
 353 portion of type-*A* individuals in graph-structured populations, in which the same  
 354 graph defines dispersal and interactions among individuals (Lieberman et al.,  
 355 2005; Hindersin & Traulsen, 2015; McAvoy & Hauert, 2015), so that  $\mathbf{E} = \mathbf{D}$ .

356 **Undirected transitive graphs** When the graph undirected and transitive, the  
 357 equations for the expected frequency of altruists (type-*A* individuals) can be fur-  
 358 ther simplified as follows:

**Moran, Birth-Death**

$$\mathbb{E}[\bar{X}] \approx p + \delta \frac{p(1-p)}{\mu} \left[ b \left( \frac{-\mu v}{(1-\mu)^2} (1 - \lambda_M) + \frac{\lambda_M}{1-\mu} d_{11} \right) - c \left( \frac{\lambda_M - \mu}{1-\mu} \right) \right]. \quad (26)$$

**Moran, Death-Birth**

$$\mathbb{E}[\bar{X}] \approx p + \delta \frac{p(1-p)}{\mu} \left[ b \left( \frac{-\mu(2-\mu)v}{(1-\mu)^3} (1 - \lambda_M) + \frac{\lambda_M}{1-\mu} \frac{\sum_k d_{1k}^2}{v} + \frac{\lambda_M}{(1-\mu)^2} d_{11} \right) - c \left( \frac{-\mu(2-\mu) + \lambda_M}{(1-\mu)^2} + \frac{\lambda_M}{(1-\mu)} \frac{d_{11}}{v} \right) \right]. \quad (27)$$

359 In both cases,  $\lambda_M$  is obtained from eq. (17). Under a Wright-Fisher updating,  
 360 eq. (25) cannot be much further simplified.

361 **Small graphs**

362 For regular graphs of small size, the probabilities of identity by descent can be  
363 calculated directly using eq. (16) (Moran model) or eq. (23) (Wright-Fisher). In  
364 figure 2, we show the value of  $\mathbb{E}[\bar{X}]$  on three regular graphs that have the same  
365 size ( $N = 12$ ) and the same degree ( $v = 3$ ), and we consider three common life-  
366 cycles in populations of fixed size (Moran Death-Birth, Moran Birth-Death, Wright-  
367 Fisher). We compare the prediction based on eq. (9) (curves) to the outputs of  
368 stochastic simulations (points). For all life-cycles, increasing the mutation prob-  
369 ability  $\mu$  makes  $\mathbb{E}[\bar{X}]$  closer to its value at the mutation-drift equilibrium ( $p$ ). The  
370 curves corresponding to different structures are almost undistinguishable under  
371 a Moran model (figures 2(a) and (b))—the curve corresponding to the graph with  
372 no symmetry (red, squares) being a bit less similar though). In the Wright-Fisher  
373 model (figure 2(c)) however, the effects of the three structures are clearly differ-  
374 ent, even when  $\mu$  becomes very small: knowing only the size ( $N$ ) and degree ( $v$ )  
375 of a regular graph is not enough in this case to precisely predict the expected  
376 frequency of altruists in the population.

377 **Large graphs: variations on a circle**

378 When the number of nodes gets larger, we have to concentrate on graphs with  
379 a high level of symmetry. Here we will consider 1-dimensional graphs (graphs  
380 whose nodes can be relabelled to satisfy eq. (2)) that are undirected, and hence  
381 that can be categorised as undirected transitive graphs. For simplicity, we can  
382 consider a circle graph, such that the nodes are arranged on a circle, and each  
383 node is connected to its two neighbors only. Here, we assume that the num-



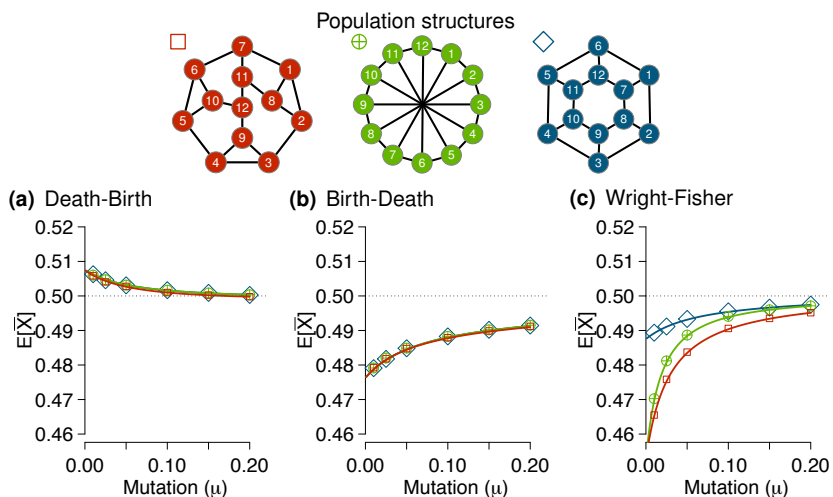

**Figure 2:** Expected frequency of type-A individuals  $\mathbb{E}[\bar{X}]$ , depending on population structure (legend on the first line), updating rule ((a): Moran Death-Birth, (b): Moran Birth-Death, (c): Wright-Fisher), and mutation probability  $\mu$  (horizontal axis): Comparison between the theoretical prediction (curves) and the outcomes of numerical simulations (points). The horizontal dotted gray line corresponds to  $p$ , the expected frequency of type-A individuals when there is no selection (*i.e.*, when  $\delta = 0$ ). Other parameters:  $\delta = 0.005$ ,  $p = 1/2$ .

384 ber of nodes is infinite:  $N \rightarrow \infty$ . As previously, a given node hosts exactly one  
 385 individual (see figure 3(a)).

386 Under a Moran model, using eq. (B.12b), we find for  $\mu > 0$

$$\lambda_M = \sqrt{\mu(2 - \mu)}, \quad (28a)$$

387 and, although the quantity is not needed to compute  $\mathbb{E}[\bar{X}]$  under a Moran model,  
 388 the probability of identity by descent between two neighbors on the circle is

389 given by

$$Q_M = \frac{1 - \sqrt{(2 - \mu)\mu}}{1 - \mu}, \quad (28b)$$

390 and we recover the formula presented in, *e.g.*, Allen et al. (2012) (see Appendix B.2.4  
 391 for details). This result is plotted in figure 3(c). We however need to note that the  
 392 first-order approximation for  $\mathbb{E}[\bar{X}]$  fails when both  $\mu \rightarrow 0$  and  $N \rightarrow \infty$ : this is  
 393 because the integral behind eq. (28a) does not converge when  $\mu \rightarrow 0$ . Similarly,  
 394 for instance, the first order approximation for the probability that two neighbors  
 395 are identical by descent  $1 - \mu(N - 1)$ , which was obtained by Taylor et al. (2007a),  
 396 fails when  $N$  is too large compared to  $\mu$ .

397 The circle graph is too particular a graph for a Wright-Fisher updating. In-  
 398 deed, while we find the same equation for  $\lambda_{WF}$  as for  $\lambda_M$  in this case (eq. (28a)),  
 399 the probability of identity by descent between neighbors is equal to 0. This is  
 400 because all individuals reproduce at each time step, and their offspring can only  
 401 establish on the node on the left or on the right of their parent, so that related-  
 402 ness cannot build up. We can however modify the graph to allow for establish-  
 403 ment in the parent's node: with probability  $(1 - m)$  the offspring remain where  
 404 the parent was, otherwise they move to the right or the left-hand side node (with  
 405 probability  $m/2$  for each; see figure 32(b)). In this case, we find the following  
 406 probability of identity by descent between neighbors:

$$Q_{WF} = \frac{\mu(2 - \mu) + 2(1 - \mu)^2 m(1 - m) - \sqrt{\mu(2 - \mu)(\mu + 2m(1 - \mu))(2 - \mu - 2m(1 - \mu))}}{2(1 - \mu)^2 m(1 - m)}. \quad (29)$$

407 (See Appendix B.3.4 for details.) The result is plotted in figure 3(d) for different  
 408 values of the emigration probability  $m$ .

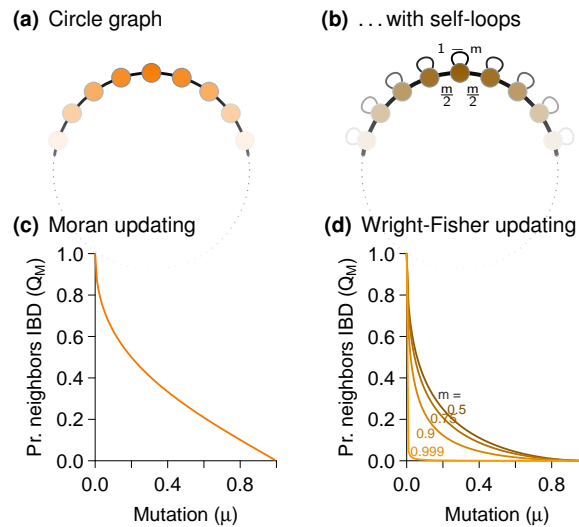

**Figure 3:** Circle graphs, without (a) or with self-loops ((b)); the weight of the self-loop is  $1 - m$ , and Probability that two neighbors on the graph are identical by descent, as function of the mutation probability  $\mu$ , for the Moran updating on an infinite circle graph (c), and for the Wright-Fisher updating on an infinite circle graph with self loops (d). In (d), emigration probabilities  $m$  take values 0.5, 0.75, 0.9, 0.999 (increasingly lighted curves).

## 409 5 Discussion

410 While most studies on the evolution of cooperation assume an almost perfect fi-  
 411 delity of strategy transmission from parent to offspring, here, we explored the  
 412 effect of arbitrary mutation on the evolution of social behavior in structured  
 413 populations. We provide a formula (eq. (12)) that gives the expected frequency  
 414 of a given strategy, for any life-cycle, any mutation probability, and that is valid  
 415 in populations of fixed size that are such that the reproductive values of all sites  
 416 are equal (*i.e.*, when all individuals have the same fecundity, they all have the

417 same chance of actually reproducing). The formula depends on the probability  
418 of identity by descent of pairs of individuals, and we show how to compute those  
419 in general.

## 420 **Identity by descent and expected state of pairs of sites**

421 The effects of social interactions depend on the actual types of the individuals  
422 who interact. With imperfect strategy transmission from parents to their off-  
423 spring ( $\mu > 0$ ), common ancestry does not guarantee that two individuals are  
424 of the same type. The concept of identity by descent, as we use it in this arti-  
425 cle, adds to common ancestry the condition that no mutation has occurred in  
426 the two individuals' lineages since the common ancestor (Kimura & Crow, 1964;  
427 Taylor et al., 2007b), and hence guarantees that the two individuals are of the same  
428 type. Two individuals that are not IBD can be treated independently, and we can  
429 hence relate the probability that the individuals at two sites  $i$  and  $j$  to their ex-  
430 pected state (eq. (11) and Allen & Nowak (2014)). Finally, equations with proba-  
431 bilities of identity by descent are much simpler than those for the expected state  
432 of pairs of sites.

## 433 **A structure parameter $\kappa$**

434 Tarnita et al. (2009) and Taylor & Maciejewski (2012) showed that, when so-  
435 cial interactions affect fecundities, there exists a parameter independent of the  
436 terms of the interaction matrix that summarizes the effects of population struc-  
437 ture (in terms of dispersal patterns and also of who interacts with whom) and  
438 depends on the rule chosen to update the population and on mutation; here we  
439 provide a generic formula for such a structure parameter. This parameter,  $\kappa$ , can

440 be interpreted as a scaled relatedness (Queller, 1994; Lehmann & Rousset, 2010),  
441 which includes the effect of competition. Eq. (13) provides a generic formula for  
442  $\kappa$ , for any life-cycle and population structure (provided condition eq. (1) is sat-  
443 isfied).

444 The actual value of the scaled relatedness  $\kappa$  depends on the life-cycle and  
445 on the mutation probability  $\mu$ . First,  $\kappa$  includes competition (what we call “in-  
446 direct effects”), and the scale of competition depends on the life-cycle (Grafen  
447 & Archetti, 2008; Débarre et al., 2014). Second, even direct effects—and so even  
448 what is referred to as relatedness—do depend on the life-cycle and  $\mu$ .

449 Finally, there is a single structure parameter  $\kappa$  because social interactions  
450 only affect fecundity. Previous studies assuming vanishing or absent mutation  
451 have shown that the parameter will be different if social interactions instead  
452 influence survival (Nakamaru & Iwasa, 2006; Taylor, 2010) and that we need  
453 more than one parameter if social interactions affect both fecundity and sur-  
454 vival (Débarre et al., 2014).

## 455 **Updating rules and the evolution of altruism**

456 We illustrate our results with specific updating rules, with either exactly new in-  
457 dividual at each time step (Moran Birth-Death, Moran Death-Birth), or exactly  
458  $N$  new individuals, *i.e.*, the entire population being renewed at each time step  
459 (Wright-Fisher). Previous studies done under the assumption of vanishing mu-  
460 tation rates (and with undirected transitive dispersal graphs) found that updat-  
461 ing rules had a great impact on the evolution of altruism, and in particular, that  
462 selection did not favor altruism (benefits given to others exclusively) under a  
463 Wright-Fisher or Moran Birth-Death updating (the “cancellation result”; Taylor,

464 1992; Taylor et al., 2011; Ohtsuki et al., 2007; Lehmann et al., 2007); the result  
465 holds with imperfect strategy transmission as well. This is because the compe-  
466 tition radius (individuals one dispersal step away [**D**] with a Moran Birth-Death  
467 updating, individuals two dispersal steps away [**D.D**] with a Wright-Fisher up-  
468 dating) matches the radius on which identities by descent are computed (see  
469 eq. (17) and eq. (24)). On the other hand, under a Death-Birth updating, com-  
470 petition is against individuals two dispersal steps away, but identity by descent  
471 is computed using individuals one dispersal step away: competition is “diluted”,  
472 and altruism can be favored by selection. Again, note that the conclusions for  
473 the Moran model depend on which trait is affected by the social behavior: al-  
474 truism is favored under a Birth-Death updating if survival, instead of fecundity,  
475 is affected by social behavior (Nakamaru & Iwasa, 2006; Taylor, 2010; Débarre  
476 et al., 2014).

## 477 **Implications for adaptive dynamics**

478 Our results are obtained by considering the changes that occur during one time  
479 step from a given population state, chosen from the stationary distribution of  
480 population states—hence the phrase “long-term”, which differs from the use  
481 made by, for instance Van Cleve (2015), where it refers to a trait substitution  
482 sequence. Yet, our results can also be used in that context. The adaptive dy-  
483 namics framework describes evolution as a series of trait substitutions (Geritz  
484 et al., 1997; Champagnat et al., 2006; Champagnat & Lambert, 2007; Lehmann,  
485 2012; Lehmann & Rousset, 2014) and is based on the assumption that mutations  
486 are rare and incremental; in a finite population, trait evolution proceeds along  
487 a gradient of fixation probabilities. Computing those fixations probabilities can

488 be challenging in spatially structured populations.

489        Yet, the existence of a single parameter (in this case, defined as  $\sigma = (\kappa -$   
490  $1)/(\kappa + 1)$ , Tarnita et al., 2009) to characterize population structure and update  
491 rules led to the extension of the adaptive dynamics framework to populations  
492 with arbitrary structure (Allen et al., 2013), the structure parameter however re-  
493 maining unspecified in general. Our formula for  $\kappa$  (eq. (13)) is valid for arbitrary  
494 mutation, so *a fortiori* for vanishing mutation probabilities, and can therefore be  
495 used to explicitly study adaptive dynamics in structured populations (provided  
496 the reproductive values of all sites are equal).

## 497 **Data accessibility**

498 All codes are provided as a zipped folder, and can be downloaded from [https://](https://figshare.com/articles/Mutation_and_social_evolution/3207748)  
499 [figshare.com/articles/Mutation\\_and\\_social\\_evolution/3207748](https://figshare.com/articles/Mutation_and_social_evolution/3207748). They will  
500 be uploaded on Dryad when the manuscript is accepted.

## 501 **Competing interests**

502 I have no competing interests.

## 503 **Acknowledgements**

504 I thank Sally Otto and François Bienvenu for comments on the manuscript and  
505 Ben Allen for clarifications. The simulations were run on the Migale cluster  
506 (<http://migale.jouy.inra.fr/>).

## 507 **Funding**

508 We thank the Agence Nationale de la Recherche for funding (grant ANR-14-ACHN-  
509 0003-01).

## 510 **References**

- 511 Allen, B. & Nowak, M. A. 2014: Games on graphs. *EMS surveys in mathematical*  
512 *sciences* 1(1):113–151.
- 513 Allen, B.; Nowak, M. A. & Dieckmann, U. 2013: Adaptive dynamics with interac-  
514 *tion structure. The American Naturalist* 181(6):E139–E163.
- 515 Allen, B.; Sample, C.; Dementieva, Y.; Medeiros, R. C.; Paoletti, C. & Nowak, M. A.  
516 2015: The molecular clock of neutral evolution can be accelerated or slowed  
517 by asymmetric spatial structure. *PLoS Comput Biol* 11(2):1–32.
- 518 Allen, B.; Traulsen, A.; Tarnita, C. E. & Nowak, M. A. 2012: How mutation affects  
519 evolutionary games on graphs. *Journal of Theoretical Biology* 299:97 – 105.  
520 *Evolution of Cooperation.*
- 521 Caswell, H. 2001: *Matrix population models.* Wiley Online Library.
- 522 Champagnat, N.; Ferrière, R. & Méléard, S. 2006: Unifying evolutionary dynam-  
523 *ics: from individual stochastic processes to macroscopic models. Theoretical*  
524 *population biology* 69(3):297–321.
- 525 Champagnat, N. & Lambert, A. 2007: Evolution of discrete populations and the  
526 canonical diffusion of adaptive dynamics. *The Annals of Applied Probability*  
527 17(1):102–155.



- 528 Cockerham, C. C. & Weir, B. S. 1993: Estimation of gene flow from F-statistics.  
529 *Evolution* 47(3):855–863.
- 530 Débarre, F.; Hauert, C. & Doebeli, M. 2014: Social evolution in structured popu-  
531 lations. *Nature Communications* 5.
- 532 Frank, S. A. 1997: The price equation, fisher’s fundamental theorem, kin selec-  
533 tion, and causal analysis. *Evolution* 51(6):1712–1729.
- 534 Gandon, S. & Rousset, F. 1999: Evolution of stepping-stone dispersal  
535 rates. *Proceedings of the Royal Society of London B: Biological Sciences*  
536 266(1437):2507–2513.
- 537 Geritz, S.; Kisdi, E.; Meszner, G. & Metz, J. 1997: Evolutionarily singular strate-  
538 gies and the adaptive growth and branching of the evolutionary tree. *Evolu-  
539 tionary Ecology* 12(1):35–57.
- 540 Grafen, A. & Archetti, M. 2008: Natural selection of altruism in inelastic viscous  
541 homogeneous populations. *Journal of Theoretical Biology* 252(4):694 – 710.
- 542 Hindersin, L. & Traulsen, A. 2015: Most undirected random graphs are amplifiers  
543 of selection for birth-death dynamics, but suppressors of selection for death-  
544 birth dynamics. *PLoS Comput Biol* 11(11):1–14.
- 545 Kimura, M. & Crow, J. F. 1964: The number of alleles that can be maintained in a  
546 finite population. *Genetics* 49(4):725–738.
- 547 Lehmann, L. 2012: The stationary distribution of a continuously varying strat-  
548 egy in a class-structured population under mutation–selection–drift balance.  
549 *Journal of Evolutionary Biology* 25(4):770–787.
- 550 Lehmann, L.; Keller, L. & Sumpter, D. J. T. 2007: The evolution of helping and  
551 harming on graphs: the return of the inclusive fitness effect. *Journal of Evolu-  
552 tionary Biology* 20(6):2284–2295.
- 553 Lehmann, L. & Rousset, F. 2010: How life history and demography promote or  
554 inhibit the evolution of helping behaviours. *Philosophical Transactions of the  
555 Royal Society B: Biological Sciences* 365(1553):2599–2617.
- 556 Lehmann, L. & Rousset, F. 2014: The genetical theory of social behaviour. *Philo-  
557 sophical Transactions of the Royal Society of London B: Biological Sciences*  
558 369(1642).
- 559 Lieberman, E.; Hauert, C. & Nowak, M. A. 2005: Evolutionary dynamics on  
560 graphs. *Nature* 433(7023):312–316.

- 561 Maciejewski, W. 2014: Reproductive value in graph-structured populations.  
562 *Journal of Theoretical Biology* 340:285 – 293.
- 563 Malécot, G. 1975: Heterozygosity and relationship in regularly subdivided pop-  
564 ulations. *Theoretical Population Biology* 8(2):212 – 241.
- 565 McAvoy, A. & Hauert, C. 2015: Structural symmetry in evolutionary games. *Jour-  
566 nal of The Royal Society Interface* 12(111).
- 567 Moran, P. 1962: *The statistical processes of evolutionary theory.* Clarendon  
568 Press; Oxford University Press.
- 569 Nakamaru, M. & Iwasa, Y. 2006: The coevolution of altruism and punishment:  
570 Role of the selfish punisher. *Journal of Theoretical Biology* 240(3):475 – 488.
- 571 Nowak, M.; Sasaki, A.; Taylor, C. & Fudenberg, D. 2004: Emergence of cooper-  
572 ation and evolutionary stability in finite populations. *Nature* 428(6983):646–  
573 650.
- 574 Nowak, M. A. 2006: Five rules for the evolution of cooperation. *Science*  
575 314(5805):1560–1563.
- 576 Nowak, M. A.; Tarnita, C. E. & Wilson, E. O. 2010: The evolution of eusociality.  
577 *Nature* 466(7310):1057–1062.
- 578 Ohtsuki, H.; Hauert, C.; Lieberman, E. & Nowak, M. A. 2006: A simple rule  
579 for the evolution of cooperation on graphs and social networks. *Nature*  
580 441(7092):502–505.
- 581 Ohtsuki, H. & Nowak, M. A. 2006: The replicator equation on graphs. *Journal of*  
582 *Theoretical Biology* 243(1):86 – 97.
- 583 Ohtsuki, H.; Nowak, M. A. & Pacheco, J. M. 2007: Breaking the symmetry  
584 between interaction and replacement in evolutionary dynamics on graphs.  
585 *Phys. Rev. Lett.* 98:108106.
- 586 Queller, D. C. 1994: Genetic relatedness in viscous populations. *Evolutionary*  
587 *Ecology* 8:70–73. 10.1007/BF01237667.
- 588 Rousset, F. 2004: *Genetic Structure and Selection in Subdivided Populations.*  
589 Princeton University Press, Princeton, NJ.
- 590 Rousset, F.; Billiard, S. et al. 2000: A theoretical basis for measures of kin selection  
591 in subdivided populations: finite populations and localized dispersal. *Journal*  
592 *of Evolutionary Biology* 13(5):814–825.

- 593 Slatkin, M. 1991: Inbreeding coefficients and coalescence times. *Genetical re-*  
594 *search* 58(02):167–175.
- 595 Slatkin, M. 1993: Isolation by distance in equilibrium and non-equilibrium pop-  
596 *ulations*. *Evolution* 47(1):264–279.
- 597 Tarnita, C. E.; Ohtsuki, H.; Antal, T.; Fu, F. & Nowak, M. A. 2009: Strategy selection  
598 *in structured populations*. *Journal of Theoretical Biology* 259(3):570 – 581.
- 599 Tarnita, C. E. & Taylor, P. D. 2014: Measures of relative fitness of social behaviors  
600 *in finite structured population models*. *The American Naturalist* 184(4):477–  
601 488.
- 602 Taylor, P. 2010: Birth–death symmetry in the evolution of a social trait. *Journal*  
603 *of Evolutionary Biology* 23(12):2569–2578.
- 604 Taylor, P.; Lillicrap, T. & Cownden, D. 2011: Inclusive fitness analysis on mathe-  
605 *matical groups*. *Evolution* 65(3):849–859.
- 606 Taylor, P. & Maciejewski, W. 2012: An inclusive fitness analysis of synergistic in-  
607 *teractions in structured populations*. *Proceedings of the Royal Society B: Bio-*  
608 *logical Sciences* .
- 609 Taylor, P. D. 1990: Allele-frequency change in a class-structured population. *The*  
610 *American Naturalist* 135(1):pp. 95–106.
- 611 Taylor, P. D. 1992: Inclusive fitness in a homogeneous environment. *Proceedings*  
612 *of the Royal Society of London. Series B: Biological Sciences* 249(1326):299–  
613 302.
- 614 Taylor, P. D.; Day, T. & Wild, G. 2007a: Evolution of cooperation in a finite homo-  
615 *geneous graph*. *Nature* 447(7143):469–472.
- 616 Taylor, P. D.; Day, T. & Wild, G. 2007b: From inclusive fitness to fixation proba-  
617 *bility in homogeneous structured populations*. *Journal of Theoretical Biology*  
618 249(1):101 – 110.
- 619 Van Cleve, J. 2015: Social evolution and genetic interactions in the short and  
620 *long term*. *Theoretical Population Biology* 103:2 – 26.
- 621 Wakano, J. Y. & Lehmann, L. 2014: Evolutionary branching in deme-structured  
622 *populations*. *Journal of theoretical biology* 351:83–95.

623 Wild, G. & Traulsen, A. 2007: The different limits of weak selection and the  
624 evolutionary dynamics of finite populations. *Journal of Theoretical Biology*  
625 247(2):382 – 390.

626 Wolfram Research, Inc. 2015: *Mathematica Edition: Version 10.1*. Wolfram Re-  
627 search, Inc., Champaign, Illinois.

## Appendix A

---

### 628 **A Expected frequency of type-*A* individuals**

#### 629 **Conditional expectations**

630 We denote by  $\mathbb{E}[X_i(t+1)|X(t)]$  the expected state of the individual at site  $i$  at  
631 time  $t+1$ , given that the population is in state  $X$  at time  $t$ . Because  $X_i$  is an  
632 indicator variable,  $\mathbb{E}[X_i(t+1)|X(t)] = \mathbb{P}[X_i(t+1) = 1|X(t)]$ . Site  $i$  is occupied by  
633 an individual of type  $A$  at time  $t+1$  if: *i*) it was occupied by an individual of type  
634  $A$  at time  $t$  and this individual has not been replaced (*i.e.*, has not died) between  
635  $t$  and  $t+1$  (first term in eq. (A.1)), or *ii*) the individual has been replaced by a  
636 new one, whose parent was in site  $j$  at  $t$ ; in this case, either the parent was of  
637 type  $A$  and the offspring is not a mutant; or, whichever the type of the parent,  
638 the offspring is a mutant and mutated into type  $A$  (second term of eq. (A.1)):

$$\mathbb{E}[X_i(t+1)|X(t)] = (1 - D_i)X_i + \sum_j B_{ij} (X_j (1 - \mu) + \mu p). \quad (\text{A.1})$$

#### 639 **Unconditional expectations**

640 We now want to consider the long-term outcome of competition. We denote by  
641  $\xi(X, \delta, \mu)$  the probability that the population is in state  $X$ , given phenotype dif-  
642 ference  $\delta$  between the two types and a mutation rate  $\mu$ , and by  $\Omega$  the ensemble  
643 of all possible population states. By definition, the expectation of the state of the  
644 population is given by  $\mathbb{E}[X] = \sum_{X \in \Omega} X \xi(X, \delta, \mu)$ .

645 When the stationary distribution is reached (*i.e.*, for very large  $t$ ),  $\mathbb{E}[X(t+1)] = \mathbb{E}[X(t)] = \mathbb{E}[X]$ ; we consider the population average of  $X$ ,  $\bar{X} = \sum_i X_i / N$ .

## Appendix A

---

647 From eq. (A.1), we obtain

$$\mathbb{E}[\bar{X}] = \sum_{X \in \Omega} \sum_{i=1}^N \frac{1}{N} \left( \sum_{j=1}^N B_{ij} X_j - D_i X_i - \mu \sum_{j=1}^N B_{ij} (X_j - p) + X_i \right) \xi(X, \delta, \mu),$$

648 which, after simplifications, becomes

$$\sum_{X \in \Omega} \frac{1}{N} \left[ \sum_{j=1}^N \left( \sum_i B_{ij} - D_j \right) X_j - \mu \sum_i \sum_j B_{ij} (X_j - p) \right] \xi(X, \delta, \mu) = 0. \quad (\text{A.2})$$

649 **Weak selection approximation** While eq. (A.2) is valid for any  $\mu$  and  $\delta$ , we now  
 650 assume that  $\delta$ , which scales the phenotype difference, is small, so that we can  
 651 neglects terms of order  $\delta^2$  and higher. We note that in the absence of selection  
 652 (*i.e.*, when the expressed phenotypes are identical,  $\delta = 0$ ), the expected state of  
 653 a site  $j$  when the stationary distribution is reached is equal to the probability  
 654 that a mutated offspring is of type  $A$  (*i.e.*,  $\sum_{X \in \Omega} X_j \xi(X, 0, \mu) = p$ ; see section A.3  
 655 below for more details). Using eq. (6) and the compact notation  $\partial_\delta$  to represent  
 656  $\left. \frac{\partial}{\partial \delta} \right|_{\delta=0}$ , a first-order expansion of eq. (A.2) yields, after simplifications:

$$\begin{aligned} 0 = & \frac{\delta}{N} \sum_{X \in \Omega} \left[ \sum_j \left( \sum_i \partial_\delta B_{ij} - \partial_\delta D_j \right) X_j - \mu \sum_i \sum_j \partial_\delta B_{ij} (X_j - p) \right] \xi(X, 0, \mu) \\ & - \frac{\delta \mu}{N} \sum_{X \in \Omega} \left[ \sum_j B^* (X_j - p) \right] \partial_\delta \xi(X, \delta, \mu) + O(\delta^2). \end{aligned} \quad (\text{A.3a})$$

## Appendix A

---

657 Because  $\xi$  is a probability distribution,  $\sum_{X \in \Omega} \partial_\delta \xi(X, \delta, \mu) = 0$ ; reorganizing eq. (A.3a),  
 658 we obtain

$$\begin{aligned} \partial_\delta \mathbb{E}[\bar{X}] = \frac{1}{\mu N B^*} & \left( \sum_{X \in \Omega} \left[ \sum_j \left( \sum_i \partial_\delta B_{ij} - \partial_\delta D_j \right) X_j \right] \xi(X, 0, \mu) \right. \\ & \left. - \sum_{X \in \Omega} \left[ \mu \sum_{i,j} \partial_\delta B_{ij} (X_j - p) \right] \xi(X, 0, \mu) \right) + O\left(\frac{\delta}{\mu B^*}\right). \end{aligned} \quad (\text{A.3b})$$

659 We can now use the chain rule:

$$\partial_\delta B_{ij} = \sum_{k=0}^N \frac{\partial B_{ij}}{\partial f_k} \Big|_{\delta=0} \partial_\delta f_k, \quad (\text{A.4a})$$

$$\partial_\delta D_j = \sum_{k=0}^N \frac{\partial D_j}{\partial f_k} \Big|_{\delta=0} \partial_\delta f_k, \quad (\text{A.4b})$$

660 where the  $\partial_\delta f_k$  terms are computed using the definition of  $f$  presented in eq. (3b).  
 661 We also denote by  $P_{jk}$  the expected state of a pair of sites  $(j, k)$  evaluated when  
 662 there are no social interactions ( $\delta = 0$ ):

$$P_{jk} = \sum_{X \in \Omega} X_j X_k \xi(X, 0, \mu). \quad (\text{A.5})$$

663 Doing so, we realize that we can write eq. (A.3b) as

$$\partial_\delta \mathbb{E}[\bar{X}] = \frac{1}{\mu N B^*} (\beta b - \gamma c) + O\left(\frac{\delta}{\mu B^*}\right), \quad (\text{A.6})$$

664 with  $\beta$  and  $\gamma$  as defined in eq. (10).

665 Plugging eq. (A.6) in the following equation

$$\mathbb{E}[\bar{X}] = p + \delta \partial_\delta \mathbb{E}[\bar{X}] + O(\delta^2), \quad (\text{A.7})$$

## Appendix A

---

666 we recover eq. (9).

### 667 **In the absence of selection ( $\delta = 0$ )**

668 In the absence of selection, neither  $D_i$  nor  $B_{ij}$  depend on the state of the popula-  
669 tion, because all individuals now have the same fecundity. Consequently, when  
670  $\delta = 0$ , and given that neutral reproductive values are all equal (eq. (6) in the main  
671 text), eq. (A.1) becomes

$$\mathbb{E}[X_i(t+1)|X(t)] = (1 - B^*)X_i + \sum_j B_{ij}^0 (X_j(1 - \mu) + \mu p B^*). \quad (\text{A.8})$$

672 We now take the expectation of eq. (A.8) over the neutral distribution of states  
673 ( $\xi(X, 0, \mu)$ ); since  $B_{ij}^0$  does not depend on  $X$ , we have

$$\mathbb{E}_0[X_i] = (1 - B^*)\mathbb{E}_0[X_i] + \sum_j B_{ij}^0 (\mathbb{E}_0[X_j](1 - \mu) + \mu p B^*), \quad (\text{A.9a})$$

674 and we obtain after simplifying

$$\mathbb{E}_0[X_i] = p. \quad (\text{A.9b})$$

### 675 **Weak mutation**

676 When  $\mu = 0$ , there is no stationary distribution of states, because the states  $X = \mathbf{0}$   
677 and  $X = \mathbf{1}$  (loss of type-*A* and loss of type-*B* individuals, respectively) are ab-  
678 sorbing. We can nevertheless extend  $\xi$  by continuity at  $\mu = 0$ , so that  $\xi(X, \delta, 0) =$   
679  $\lim_{\mu \rightarrow 0} \xi(X, \delta, \mu)$ . Then, it does not matter whether we Taylor-expand  $\xi$  first in  $\delta$   
680 then in  $\mu$  or first in  $\mu$  and then in  $\delta$ , and so we can consider  $\mu \ll \delta$  and  $\delta \ll \mu$



## Appendix A

---

681 (Tarnita & Taylor, 2014).

682 **Weak selection then weak mutation** Starting from eq. (A.3a), a first order ex-  
 683 pansion near  $\mu = 0$  yields

$$\begin{aligned} 0 = & \frac{1}{N} \sum_{X \in \Omega} \sum_j \left( \sum_i \partial_\delta B_{ij} - \partial_\delta D_j \right) X_j \partial_\mu \xi(X, 0, \mu) - \frac{1}{N} \sum_{X \in \Omega} \sum_{i,j} \partial_\delta B_{ij} (X_j - p) \xi(X, 0, 0) \\ & - \frac{1}{N} \sum_{X \in \Omega} \sum_j B^*(X_j - p) \partial_\delta \xi(X, \delta, 0) + O\left(\frac{\delta}{\mu}\right) + O(\mu). \end{aligned} \tag{A.10}$$

684 Here we have  $\delta \ll \mu \ll 1$ . Notation  $\partial_\mu$  stands for  $\left. \frac{\partial}{\partial \mu} \right|_{\mu=0}$ .

685 **Weak mutation then weak selection** Starting from eq. (A.2), a first order ex-  
 686 pansion near  $\mu = 0$  and then a first order expansion near  $\delta = 0$  yields

$$\begin{aligned} 0 = & \frac{1}{N} \sum_{X \in \Omega} \sum_j \left( \sum_i \partial_\delta B_{ij} - \partial_\delta D_j \right) X_j \partial_\mu \xi(X, 0, \mu) - \frac{1}{N} \sum_{X \in \Omega} \sum_{i,j} \partial_\delta B_{ij} (X_j - p) \xi(X, 0, 0) \\ & - \frac{1}{N} \sum_{X \in \Omega} \sum_j B^*(X_j - p) \partial_\delta \xi(X, \delta, 0) + O\left(\frac{\mu}{\delta}\right) + O(\delta). \end{aligned} \tag{A.11}$$

687 Here we have  $\mu \ll \delta \ll 1$ .

688 At the first orders, eq. (A.10) and eq. (A.11) are the same.

689 When  $\mu \rightarrow 0$ , the population is either in state  $X = \mathbf{0}$  or in state  $X = \mathbf{1}$ , so

$$\xi(\mathbf{1}, \delta, 0) = 1 - \xi(\mathbf{0}, \delta, 0) = \lim_{\mu \rightarrow 0} \mathbb{E}[\bar{X}], \tag{A.12a}$$

## Appendix A

---

690 and as a result

$$\partial_{\delta}\xi(\mathbf{1}, \delta, 0) = -\partial_{\delta}\xi(\mathbf{0}, \delta, 0). \quad (\text{A.12b})$$

691 In addition, when  $\delta = 0$ ,

$$\xi(\mathbf{1}, 0, \mu) = p. \quad (\text{A.12c})$$

692 So at the first orders, reorganizing eq. (A.10) (or equivalently eq. (A.11)), we ob-  
693 tain the following equation for the derivative with respect to  $\delta$  of the expected  
694 state of the population when  $\mu \rightarrow 0$  (Tarnita & Taylor, 2014):

$$\begin{aligned} \partial_{\delta}\xi(\mathbf{1}, \delta, 0) \approx \frac{1}{B^*} \left[ \frac{1}{N} \sum_{X \in \Omega} \sum_j \left( \sum_i \partial_{\delta} B_{ij} - \partial_{\delta} D_j \right) X_j \partial_{\mu}\xi(X, 0, \mu) \right. \\ \left. - \frac{1}{N} p(1-p) \sum_{i,j} (\partial_{\delta} B_{ij}(\mathbf{1}) - \partial_{\delta} B_{ij}(\mathbf{0})) \right]. \end{aligned} \quad (\text{A.13})$$

## Appendix B

---

### 695 **B Probabilities of identity by descent**

696 We first start by showing the link between the expected state of a pair of sites  
697 ( $P_{ij}$ ) and probabilities of identity by descent ( $Q_{ij}$ ), for any life-cycle.

#### 698 **Any life-cycle**

##### 699 **Notation**

700 To be able to consider any life-cycle, we use notation similar to what is used in  
701 Allen et al. (2015). At each time step, from 1 to  $N$  individuals are replaced, de-  
702 pending on the updating rule;  $R$  denotes the set of individuals that are replaced  
703 (*i.e.*, the sites where an individual is replaced by another one). For each site  $i$   
704 where a replacement happened ( $i \in R$ ),  $\alpha(i)$  gives the index of the site where the  
705 parent of the new individual lived, while for individuals that were not replaced,  
706  $\forall i \in \{1, \dots, N\} \setminus R, \alpha(i) = i^1$ . Finally,  $\rho(R, \alpha)$  denotes the probability of the replace-  
707 ment event  $(R, \alpha)$ . In the absence of selection, this probability does not depend  
708 on the current state of the population.

##### 709 **Expected state of a pair of sites**

710 Considering two different sites  $i$  and  $j$ , depending on the updating rule, at each  
711 time step,  $i$ ) either none of the individuals are replaced—then they are both of  
712 type  $A$  if they already were [first term in eq. (B.1)],  $ii$ ) either one of the individ-  
713 uals ( $i$  or  $j$ ) is replaced—then they are both of type  $A$  if the surviving individual  
714 is  $A$  and if either the parent of the other individual was of type  $A$  and no mu-

---

<sup>1</sup>Here we extend the notation used in Allen et al. (2015), because in their study,  $\alpha : R \rightarrow \{1, \dots, N\}$

## Appendix B

---

715 tation occurred, or the offspring mutated into type *A* whichever the type of its  
 716 parent [second and third terms in eq. (B.1)], or finally *iii*) both individuals are  
 717 replaced—then the probability that both offspring are of type *A* is  $P_{\alpha(i)\alpha(j)}(1-\mu+$   
 718  $\mu p)^2 + 2(p - P_{\alpha(i)\alpha(j)})(1-\mu + \mu p)(\mu p) + (1 - 2p + P_{\alpha(i)\alpha(j)})(\mu p)^2$ , which simplifies  
 719 into the fourth term in eq. (B.1)). We obtain the following equation:

$$\begin{aligned} \forall (i, j) \in \{1, \dots, N\}^2, i \neq j, \\ P_{ij} = & \sum_{\substack{R, \alpha \\ i \notin R, j \notin R}} q(R, \alpha) P_{\alpha(i)\alpha(j)} \\ & + \sum_{\substack{R, \alpha \\ i \notin R, j \in R}} q(R, \alpha) [P_{\alpha(i)\alpha(j)}(1-\mu) + p\mu p] \\ & + \sum_{\substack{R, \alpha \\ i \in R, j \notin R}} q(R, \alpha) [P_{\alpha(i)\alpha(j)}(1-\mu) + p\mu p] \\ & + \sum_{\substack{R, \alpha \\ i \in R, j \in R}} q(R, \alpha) [P_{\alpha(i)\alpha(j)}(1-\mu)^2 + (2-\mu)\mu p^2]. \end{aligned} \tag{B.1}$$

### 720 Identity by descent

721 Considering two different sites *i* and *j*, depending on the updating rule, at each  
 722 time step, *i*) either none of the individuals are replaced—then they are identical  
 723 by descent (IBD) if they already were [first term in eq. (B.1)], *ii*) either one of the  
 724 individuals (*i* or *j*) is replaced—then they are both IBD if the surviving individ-  
 725 ual and the parent of the new individual were and no mutation occurred [second  
 726 and third terms in eq. (B.1)], or finally *iii*) both individuals are replaced—then  
 727 then are IBD if their two parents were and no mutation occurred in either [fourth

## Appendix B

---

728 term in eq. (B.1)]. We obtain the following equation:

$$\begin{aligned}
 & \forall (i, j) \in \{1, \dots, N\}^2, i \neq j, \\
 Q_{ij} = & \sum_{\substack{R, \alpha \\ i \notin R, j \notin R}} \rho(R, \alpha) Q_{\alpha(i)\alpha(j)} + \sum_{\substack{R, \alpha \\ i \notin R, j \in R}} \rho(R, \alpha) Q_{\alpha(i)\alpha(j)} (1 - \mu) \\
 & + \sum_{\substack{R, \alpha \\ i \in R, j \notin R}} \rho(R, \alpha) Q_{\alpha(i)\alpha(j)} (1 - \mu) + \sum_{\substack{R, \alpha \\ i \in R, j \in R}} \rho(R, \alpha) Q_{\alpha(i)\alpha(j)} (1 - \mu)^2.
 \end{aligned} \tag{B.2}$$

729 For all pairs  $i \neq j$ , eq. (B.1) and eq. (B.2) are equivalent when we set

$$Q_{ij} = \frac{P_{ij} - p^2}{p(1 - p)}, \tag{B.3}$$

730 and eq. (B.3) is also valid when  $i = j$  (in this case  $Q_{ii} = 1$  and  $P_{ii} = p$ ). So we can

731 use the recursion on  $Q$  presented in eq. (B.2) together with eq. (B.3).

732 Finally, while  $Q_{ij}$  is an expectation over the stationary distribution of pop-

733 ulation states, we also introduce the indicator variable  $q_{ij}(t)$ , equal to 1 if, in a

734 realization of the process, the individuals at sites  $i$  and  $j$  are IBD at time  $t$ . We

735 also denote by  $\mathbf{Q}$  the matrix gathering the  $Q_{ij}$  terms.

### 736 Moran model

737 In a Moran model, exactly one individual died and one individual reproduces

738 during one time step. Given a state  $X$  at time  $t$ , for  $i \neq j$ , probabilities of identity

739 by descent verify

$$\mathbb{E}[q_{ij}(t+1)|X(t)] = q_{ij}(t) \left(1 - \frac{2}{N}\right) + \frac{1 - \mu}{N} \sum_k \frac{d_{kj} q_{ki}(t) + d_{ki} q_{kj}(t)}{\nu}. \tag{B.4}$$

## Appendix B

---

740 Taking the expectation of this quantity over the stationary distribution of states,  
741 we obtain

$$Q_{ij} = \frac{1-\mu}{2\nu} \sum_k (d_{kj}Q_{ki} + d_{ki}Q_{kj}) \quad (i \neq j), \quad (\text{B.5})$$

742 and  $Q_{ij} = 1$  when  $i = j$ . Eq. (B.5) is valid for any regular graph; all the  $Q_{ij}$  terms  
743 can be found by solving a system of  $N(N-1)/2$  equations (since  $Q_{ij} = Q_{ji}$ ). We  
744 can also write eq. (B.5) in matrix form:

$$\mathbf{Q} = \frac{1-\mu}{2\nu} (\mathbf{QD} + \mathbf{D}^T \mathbf{Q}) + \mathbf{L}, \quad (\text{B.6})$$

745 where  $\mathbf{D}$  is the adjacency matrix of the dispersal graph (with elements  $d_{ij}$ ),  $^T$   
746 denotes transposition, and  $\mathbf{L}$  is a diagonal matrix whose  $i$ th diagonal element is  
747  $1 - \sum_k d_{ki}Q_{ki}/\nu$  (*i.e.*, such that  $Q_{ii} = 1$ ).

### 748 **Transitive undirected graphs**

749 When the dispersal graph is transitive, then all the elements on the diagonal of  
750  $\mathbf{L}$  are equal, so we can write  $\mathbf{L} = \lambda_M \mathbf{I}_N$ , where  $\mathbf{I}_N$  is the  $N$  by  $N$  identity matrix.  
751 When the graph is also undirected,  $\mathbf{D} = \mathbf{D}^T$ , and we also show by induction that  
752  $\mathbf{DQ} = \mathbf{QD}$  (Grafen & Archetti, 2008).

753 Let us assume without loss of generality that initially ( $t = 0$ ) all individuals are  
754 IBD ( $q_{ij}(0) = \mathbf{1}_{NN}$ , where  $\mathbf{1}_{NN}$  is the  $N$ -by- $N$  matrix containing only ones) and  
755 of type  $B$  ( $X(0) = \{0, \dots, 0\}$ ). Also, let us denote by  $\zeta_0(X, t)$  the probability that  
756 the population is in state  $X$  at time  $t$  given that it was in state  $\{0, \dots, 0\}$  at time 0,  
757 and by  $\mathbb{E}_t[\ ]$  expectations with respect to that distribution, at time  $t$ . Then from

## Appendix B

---

758 eq. (B.4), since  $q_{ii} = 1$ , and given that the graph is regular,

$$\mathbb{E}_1[\mathbf{q}] = \left(1 - \frac{2}{N}\right) \mathbf{1}_{NN} + 2 \frac{1-\mu}{N} \mathbf{1}_{NN} + \lambda_1 \mathbf{I}_N, \quad (\text{B.7})$$

759 so

$$\mathbf{D} \cdot \mathbb{E}_1[\mathbf{q}] = \left(1 - \frac{2}{N}\right) \nu \mathbf{1}_{NN} + 2 \frac{1-\mu}{N} \nu \mathbf{1}_{NN} + \lambda_1 \mathbf{D} = \mathbb{E}_1[\mathbf{q}] \cdot \mathbf{D}. \quad (\text{B.8})$$

760 Then, assuming that  $\mathbf{D}$  and  $\mathbb{E}_t[\mathbf{q}]$  commute, and given that we assume  $\mathbf{D} = \mathbf{D}^T$ ,

$$\mathbb{E}_{t+1}[\mathbf{q}] = \left(1 - \frac{2}{N}\right) \mathbb{E}_t[\mathbf{q}] + \frac{2(1-\mu)}{N} \mathbf{D} \cdot \mathbb{E}_t[\mathbf{q}] + \lambda_t \mathbf{I}_N, \quad (\text{B.9})$$

761 so

$$\mathbf{D} \cdot \mathbb{E}_{t+1}[\mathbf{q}] = \left(1 - \frac{2}{N}\right) \mathbf{D} \cdot \mathbb{E}_t[\mathbf{q}] + \frac{2(1-\mu)}{N} \mathbf{D}^2 \cdot \mathbb{E}_t[\mathbf{q}] + \lambda_t \mathbf{D} = \mathbb{E}_{t+1}[\mathbf{q}] \cdot \mathbf{D} \quad (\text{B.10})$$

762 And so, when  $t \rightarrow \infty$ , we have  $\mathbf{D} \cdot \mathbf{Q} = \mathbf{Q} \cdot \mathbf{D}$ . □

763 Then with a transitive undirected dispersal graph, eq. (B.6), simplifies into

$$\mathbf{Q} = \frac{1-\mu}{\nu} \mathbf{D} \cdot \mathbf{Q} + \lambda_M \mathbf{I}_N, \quad (\text{B.11})$$

764 and so (for  $\mu > 0$ ),

$$\mathbf{Q} = \lambda_M \left( \mathbf{I}_N - \frac{1-\mu}{\nu} \mathbf{D} \right)^{-1}, \quad (\text{B.12a})$$

## Appendix B

---

765 with

$$\lambda_M = \frac{1}{\left( \left( \mathbf{I}_N - \frac{1-\mu}{\nu} \mathbf{D} \right)^{-1} \right)_{1,1}}. \quad (\text{B.12b})$$

766 Eq. (B.11) also implies

$$\mathbf{Q} = \frac{(1-\mu)^2}{\nu^2} \mathbf{D} \cdot \mathbf{D} \cdot \mathbf{Q} + \lambda_M \frac{1-\mu}{\nu} \mathbf{D} + \lambda_M \mathbf{I}_N. \quad (\text{B.13})$$

767 It is possible to find more explicit formulae when the graphs are transitive and  
768 when they are  $n$ -dimensional, and we do so for 1-D and 2-D graphs.

### 769 **One-dimensional graphs**

770 On a 1-D graph, numbering the different nodes modulo  $N$ , for all  $i$  and  $j$ , by  
771 definition of a 1-D graph,  $d_{ij} = d_{0,j-i} = \tilde{d}_{j-i}$ , and as a result similar equalities  
772 hold for the expected states of pairs of sites:  $Q_{ij} = Q_{0,j-i} = \tilde{Q}_{j-i}$ . We can hence  
773 rewrite eq. (B.5) as follows, keeping in mind that  $Q_{ij} = Q_{ji}$  and that node num-  
774 bering is done modulo  $N$ :

$$\begin{aligned} Q_{ij} = \tilde{Q}_{j-i} &= \frac{1-\mu}{2\nu} \sum_k d_{0,j-k} Q_{0,k-i} + d_{0,i-k} Q_{0,j-k} \quad (i \neq j) \\ &= \frac{1-\mu}{2\nu} \sum_k d_{0,k} P_{0,j-i-k} + d_{0,k} P_{0,j-i+k} \quad [\text{change of variables } k' = j-k] \\ &= \frac{1-\mu}{2\nu} \sum_k \tilde{d}_k \tilde{P}_{j-i-k} + \tilde{d}_k \tilde{P}_{j-i+k}, \end{aligned}$$

775 so that

$$\tilde{Q}_l = \frac{1-\mu}{2\nu} \left( \sum_k \tilde{d}_k \tilde{Q}_{l-k} + \tilde{d}_k \tilde{Q}_{l+k} \right) + \delta_l \lambda_M, \quad (\text{B.14})$$



## Appendix B

---

776 where  $\delta_l = 1$  when  $l \equiv 0$  and  $\delta_l = 0$  otherwise, and  $\lambda$  is as defined in the previous  
 777 section, *i.e.*, such that  $\tilde{Q}_0 = 1$ :

$$\lambda_M = 1 - \frac{1-\mu}{\nu} \sum_k \tilde{d}_k \tilde{Q}_k. \quad (\text{B.15})$$

778 (Recall that  $\tilde{Q}_l = \tilde{Q}_{-l}$ ).

779 To solve for  $\tilde{Q}_l$ , we can follow the same method as in Malécot (1975); Gandon  
 780 & Rousset (1999) and use discrete Fourier transforms, defining the transforms of  
 781  $Q$  and of  $d$  as follows:

$$\mathcal{Q}_q = \sum_{l=0}^{N-1} \tilde{Q}_l \exp\left(-i \frac{2\pi q l}{N}\right), \quad (\text{B.16a})$$

$$\mathcal{D}_q = \sum_{l=0}^{N-1} \tilde{d}_l \exp\left(-i \frac{2\pi q l}{N}\right). \quad (\text{B.16b})$$

782 and in particular ( $\nu$  being the degree of the dispersal graph)

$$\mathcal{D}_0 = \sum_l \tilde{d}_l = \nu. \quad (\text{B.16c})$$

783 We obtain

$$\mathcal{Q}_q = \lambda_M + \sum_{l=0}^{N-1} \left[ \frac{1-\mu}{2\nu} \left( \sum_k \tilde{d}_k \tilde{Q}_{l-k} + \tilde{d}_k \tilde{Q}_{l+k} \right) \right] \exp\left(-i \frac{2\pi q l}{N}\right), \quad (\text{B.17a})$$

$$= \lambda_M + \frac{1-\mu}{2\nu} (\mathcal{D}_q \mathcal{Q}_q + \mathcal{D}_{-q} \mathcal{Q}_q). \quad (\text{B.17b})$$

784 Solving for  $\mathcal{Q}_q$ , we obtain

$$\mathcal{Q}_q = \frac{\lambda_M}{1 - \frac{1-\mu}{2\nu} (\mathcal{D}_q + \mathcal{D}_{-q})}. \quad (\text{B.17c})$$

## Appendix B

---

785 To recover  $\tilde{Q}$ , we now use an Inverse Discrete Fourier Transform

$$\tilde{Q}_r = \frac{1}{N} \sum_{q=0}^{N-1} \mathcal{D}_q \exp\left(i \frac{2\pi qr}{N}\right); \quad (\text{B.18})$$

786 combining eq. (B.17c) and eq. (B.18), we obtain

$$\tilde{Q}_r = \frac{1}{N} \sum_{q=0}^{N-1} \frac{\lambda_M}{1 - \frac{1-\mu}{2\nu} (\mathcal{D}_q + \mathcal{D}_{-q})} \exp\left(i \frac{2\pi qr}{N}\right). \quad (\text{B.19a})$$

787 When  $r = 0$ , we have  $\tilde{Q}_0 = 1$ , so combining this with eq. (B.19a), we can now

788 evaluate  $\lambda$ :

$$\lambda_M = \frac{N}{\sum_{q=0}^{N-1} \frac{1}{1 - \frac{1-\mu}{2\nu} (\mathcal{D}_q + \mathcal{D}_{-q})}}. \quad (\text{B.19b})$$

789 Finally, when the graph is not oriented,  $\mathcal{D}_q = \mathcal{D}_{-q}$ .

### 790 **Two-dimensional graphs**

791 Similar calculations are done with two-dimensional graphs. Numbering is done

792 modulo  $N_1$  for the first dimension, and modulo  $N_2$  for the second dimension

793 ( $N_1 N_2 = N$ ). The 2-D equivalent of eq. (B.14) is

$$\tilde{Q}_{l_1} = \frac{1-\mu}{2\nu} \sum_{k_1=0}^{N_1-1} \sum_{k_2=0}^{N_2-1} \left( \tilde{d}_{k_1} \tilde{Q}_{l_1-k_1} + \tilde{d}_{k_1} \tilde{Q}_{l_1+k_1} \right) + \delta_{l_1} \lambda_M, \quad (\text{B.20})$$

794 where  $\delta_{k_1} = 1$  when  $(k_1, k_2) \equiv (0, 0)$  (modulo  $N_1$  and  $N_2$ ), and  $\delta_{k_1} = 0$  otherwise,

795 and

$$\lambda_M = 1 - \frac{1-\mu}{\nu} \sum_{l_1=0}^{N_1-1} \sum_{l_2=0}^{N_2-1} \tilde{d}_{k_1} \tilde{Q}_{k_1}. \quad (\text{B.21})$$

## Appendix B

---

796 We then use 2-D Discrete Fourier Transforms:

$$\mathcal{D}_{q_2}^{q_1} = \sum_{l_1=0}^{N_1-1} \sum_{l_2=0}^{N_2-1} \tilde{Q}_{l_1} \exp\left(-i \frac{2\pi q_1 l_1}{N_1}\right) \exp\left(-i \frac{2\pi q_2 l_2}{N_2}\right), \quad (\text{B.22a})$$

$$\mathcal{D}_{q_2}^{q_1} = \sum_{l_1=0}^{N_1-1} \sum_{l_2=0}^{N_2-1} \tilde{d}_{l_1} \exp\left(-i \frac{2\pi q_1 l_1}{N_1}\right) \exp\left(-i \frac{2\pi q_2 l_2}{N_2}\right), \quad (\text{B.22b})$$

797 and obtain

$$\mathcal{D}_{q_2}^{q_1} = \lambda_M + \frac{1-\mu}{2\nu} \left( \mathcal{D}_{q_2}^{q_1} + \mathcal{D}_{-q_2}^{-q_1} \right) \mathcal{D}_{q_2}^{q_1}. \quad (\text{B.23a})$$

798 Solving for  $\mathcal{D}_{q_2}^{q_1}$ ,

$$\mathcal{D}_{q_2}^{q_1} = \frac{\lambda_M}{1 - \frac{1-\mu}{2\nu} \left( \mathcal{D}_{q_2}^{q_1} + \mathcal{D}_{-q_2}^{-q_1} \right)}. \quad (\text{B.23b})$$

799 Finally, an Inverse Fourier Transform gives us  $\tilde{Q}_{r_2}^{r_1}$ :

$$\tilde{Q}_{r_2}^{r_1} = \frac{1}{N} \sum_{q_1, q_2} \frac{\lambda_M}{1 - \frac{1-\mu}{2\nu} \left( \mathcal{D}_{q_2}^{q_1} + \mathcal{D}_{-q_2}^{-q_1} \right)} \exp\left(i \frac{2\pi q_1 r_1}{N_1}\right) \exp\left(i \frac{2\pi q_2 r_2}{N_2}\right), \quad (\text{B.23c})$$

800 with  $C$  such that  $\tilde{P}_0 = p$ :

$$\lambda_M = \frac{N}{\sum_{q_1, q_2} \frac{1}{1 - \frac{1-\mu}{2\nu} \left( \mathcal{D}_{q_2}^{q_1} + \mathcal{D}_{-q_2}^{-q_1} \right)}}. \quad (\text{B.23d})$$

801 And when the graph is undirected,  $\mathcal{D}_{-q_2}^{-q_1} = \mathcal{D}_{q_2}^{q_1}$ .

## Appendix B

---

### 802 **Illustration: infinite circle**

803 On a circle graph (like in figure 3(a)), the Fourier transform of the dispersal dis-  
804 tance is

$$\mathcal{D}_q = 2 \cos\left(\frac{2\pi q}{N}\right). \quad (\text{B.24})$$

805 We can evaluate  $\lambda_M$  using eq. (B.19b),

$$\lambda_M = \frac{N}{\sum_{q=0}^{N-1} \frac{1}{1 - (1-\mu) \cos\left(\frac{2\pi q}{N}\right)}}, \quad (\text{B.25a})$$

806 and when population size is infinite, this becomes

$$\lambda_M = \frac{1}{\int_0^1 \frac{1}{1 - (1-\mu) \cos(2\pi x)} dx} = \sqrt{\mu(2-\mu)}. \quad (\text{B.25b})$$

807 But we note that the integral does not converge when  $\mu \rightarrow 0$ . Finally, we compute  
808 probabilities of identity by descent using eq. (B.19a), and obtain eq. (28b) in the  
809 main text for neighbors on the the circle ( $q = 1$ ).

### 810 **Wright-Fisher model**

811 In a Wright-Fisher model, all individuals are replaced at each time step. Given a  
812 state  $X$  at time  $t$ , for  $i \neq j$ , probabilities of identity by descent verify

$$\mathbb{E}[q_{ij}(t+1)|X(t)] = (1-\mu)^2 \sum_{k,l} \frac{d_{ki}d_{lj}}{v^2} q_{kl}(t). \quad (\text{B.26})$$

## Appendix B

---

813 Taking the expectation of this quantity over the stationary distribution of states,  
814 we obtain

$$Q_{ij} = \frac{(1-\mu)^2}{v^2} \sum_{k,l} (d_{ki} d_{lj} Q_{kl}) \quad (i \neq j), \quad (\text{B.27})$$

815 and  $Q_{ij} = 1$  when  $i = j$ . Eq. (B.27) is valid for any regular graph; all the  $Q_{ij}$  terms  
816 can be found by solving a system of  $N(N-1)/2$  equations (since  $Q_{ij} = Q_{ji}$ ). We  
817 can also write eq. (B.5) in matrix form:

$$\mathbf{Q} = \frac{(1-\mu)^2}{v^2} (\mathbf{D}^T \mathbf{Q} \mathbf{D}) + \mathbf{L}, \quad (\text{B.28})$$

818 where  $\mathbf{D}$  is the adjacency matrix of the dispersal graph (with elements  $d_{ij}$ ),  $^T$   
819 denotes transposition, and  $\mathbf{L}$  is a diagonal matrix whose  $i$ th diagonal element is  
820 such that  $Q_{ii} = 1$ .

### 821 **Transitive undirected graphs**

822 When the dispersal graph is transitive, then all the elements on the diagonal of  
823  $\mathbf{L}$  are equal, so we can write  $\mathbf{L} = \lambda_{WF} \mathbf{I}_N$ , where  $\mathbf{I}_N$  is the  $N$  by  $N$  identity matrix.  
824 Like in the case of a Moran updating, when the graph is also undirected,  $\mathbf{D} = \mathbf{D}^T$ ,  
825 and we also show by induction that  $\mathbf{D} \mathbf{Q} = \mathbf{Q} \mathbf{D}$  (Grafen & Archetti, 2008).

826 Let us assume without loss of generality that initially ( $t = 0$ ) all individuals are  
827 IBD ( $q_{ij}(0) = \mathbf{1}_{NN}$ , where  $\mathbf{1}_{NN}$  is the  $N$ -by- $N$  matrix containing only ones) and  
828 of type  $B$  ( $X(0) = \{0, \dots, 0\}$ ). Also, let us denote by  $\zeta_0(X, t)$  the probability that  
829 the population is in state  $X$  at time  $t$  given that it was in state  $\{0, \dots, 0\}$  at time 0,  
830 and by  $\mathbb{E}_t[\ ]$  expectations with respect to that distribution, at time  $t$ . Then from

## Appendix B

---

831 eq. (B.26), since  $q_{ii} = 1$ , and given that the graph is regular,

$$\mathbb{E}_1[\mathbf{q}] = \frac{(1-\mu)^2}{\nu^2} \mathbf{1}_{NN} + \lambda_1 \mathbf{I}_N, \quad (\text{B.29})$$

832 so

$$\mathbf{D} \cdot \mathbb{E}_1[\mathbf{q}] = \frac{(1-\mu)^2}{\nu^2} \nu \mathbf{1}_{NN} + \lambda_1 \mathbf{D} = \mathbb{E}_1[\mathbf{q}] \cdot \mathbf{D}. \quad (\text{B.30})$$

833 Then, assuming that  $\mathbf{D}$  and  $\mathbb{E}_t[\mathbf{q}]$  commute, and given that we assume an undi-  
834 rected dispersal graph ( $\mathbf{D} = \mathbf{D}^T$ ),

$$\mathbb{E}_{t+1}[\mathbf{q}] = \frac{(1-\mu)^2}{\nu^2} \mathbf{D} \cdot \mathbf{D} \cdot \mathbb{E}_t[\mathbf{q}] + \lambda_t \mathbf{I}_N, \quad (\text{B.31})$$

835 so

$$\mathbf{D} \cdot \mathbb{E}_{t+1}[\mathbf{q}] = \frac{(1-\mu)^2}{\nu^2} \mathbf{D} \cdot \mathbf{D} \cdot \mathbf{D} \cdot \mathbb{E}_t[\mathbf{q}] + \lambda_t \mathbf{D} = \mathbb{E}_{t+1}[\mathbf{q}] \cdot \mathbf{D} \quad (\text{B.32})$$

836 And so, when  $t \rightarrow \infty$ , we have  $\mathbf{D} \cdot \mathbf{Q} = \mathbf{Q} \cdot \mathbf{D}$ . □

837 Then with a transitive undirected dispersal graph, eq. (B.28), simplifies into

$$\mathbf{Q} = \frac{(1-\mu)^2}{\nu^2} \mathbf{D} \cdot \mathbf{D} \cdot \mathbf{Q} + \lambda_{WF} \mathbf{I}_N, \quad (\text{B.33})$$

838 and so (for  $\mu > 0$ ),

$$\mathbf{Q} = \lambda_{WF} \left( \mathbf{I}_N - \frac{(1-\mu)^2}{\nu^2} \mathbf{D}\mathbf{D} \right)^{-1}, \quad (\text{B.34a})$$

## Appendix B

---

839 with

$$\lambda_{WF} = \frac{1}{\left( \left( \mathbf{I}_N - \frac{(1-\mu)^2}{v^2} \mathbf{D}\mathbf{D} \right)^{-1} \right)_{1,1}}. \quad (\text{B.34b})$$

840 It is possible to find more explicit formulae when the graphs are transitive and  
841 when they are  $n$ -dimensional, and we do so for 1-D and 2-D graphs.

### 842 **One-dimensional graphs**

843 In a 1D graph, we can rewrite eq. (B.27) as follows, were  $\tilde{Q}_m = Q_{0m}$  (numbering  
844 being done modulo  $N$ ):

$$\tilde{Q}_m = \begin{cases} \sum_{k,l} \frac{\tilde{d}_k \tilde{d}_l}{v^2} \tilde{Q}_{m-l+k} & (m \neq 0) \\ 1 & (m = 0). \end{cases} \quad (\text{B.35})$$

845 Using a Discrete Fourier Transform (see eq. (B.16)), we obtain,

$$\mathcal{Q}_q = \frac{(1-\mu)^2}{v^2} \mathcal{D}_q \mathcal{D}_{-q} \mathcal{Q}_q + \lambda_{WF}, \quad (\text{B.36a})$$

846 with

$$\lambda_{WF} = 1 - \sum_{k,l} \frac{\tilde{d}_k \tilde{d}_l}{v^2} \tilde{Q}_{-l+k}. \quad (\text{B.36b})$$

847 Solving for  $\mathcal{Q}_q$ , we obtain

$$\mathcal{P}_q = \frac{\lambda_{WF}}{1 - \frac{(1-\mu)^2}{v^2} \mathcal{D}_q \mathcal{D}_{-q}}. \quad (\text{B.36c})$$

## Appendix B

---

848 Then using an Inverse Fourier Transform to recover  $\tilde{Q}$  (see eq. (B.18)), we obtain

$$\tilde{Q}_r = \frac{1}{N} \sum_{q=0}^{N-1} \frac{\lambda_{WF}}{1 - \frac{(1-\mu)^2}{v^2} \mathcal{D}_q \mathcal{D}_{-q}} \exp\left(i \frac{2\pi q r}{N}\right) \quad (\text{B.37})$$

849 Noting that  $\tilde{Q}_0 = 1$ , we can evaluate  $\lambda$ :

$$\lambda_{WF} = \frac{N}{\sum_{q=0}^{N-1} \frac{1}{1 - \frac{(1-\mu)^2}{v^2} \mathcal{D}_q \mathcal{D}_{-q}}}. \quad (\text{B.38})$$

### 850 Two-dimensional graphs

851 Following the same method as previously, we obtain

$$\tilde{Q}_{r_1, r_2} = \frac{1}{N} \sum_{q_1, q_2} \frac{\lambda_{WF}}{1 - \frac{(1-\mu)^2}{v^2} (\mathcal{D}_{q_2}^{q_1} \mathcal{D}_{-q_2}^{-q_1})} \exp\left(i \frac{2\pi q_1 r_1}{N_1}\right) \exp\left(i \frac{2\pi q_2 r_2}{N_2}\right), \quad (\text{B.39a})$$

with

$$\lambda_{WF} = \frac{N}{\sum_{q_1, q_2} \frac{1}{1 - \frac{(1-\mu)^2}{v^2} (\mathcal{D}_{q_2}^{q_1} \mathcal{D}_{-q_2}^{-q_1})}}. \quad (\text{B.39b})$$

### 852 Illustration: Circle graph with self-loops

853 On a circle graph with self-loops (like in figure 3(b)), the Fourier transform of the

854 dispersal distance is

$$\mathcal{D}_q = (1 - m) + m \cos\left(\frac{2\pi q}{N}\right). \quad (\text{B.40})$$



## Appendix B

---

855 (Here  $\nu = 1$ , while with the circle graph we had  $\nu = 2$ ; this does not matter for  
856 IBD). We can evaluate  $\lambda_{WF}$  using eq. (B.38),

$$\lambda_{WF} = \frac{N}{\sum_{q=0}^{N-1} \frac{1}{1 - (1-\mu)^2 \left( (1-m) + m \cos\left(\frac{2\pi q}{N}\right) \right)^2}}, \quad (\text{B.41a})$$

857 and when population size is infinite, this becomes

$$\begin{aligned} \lambda_{WF} &= \frac{1}{\int_0^1 \frac{1}{1 - (1-\mu)^2 \left( (1-m) + m \cos(2\pi x) \right)^2} dx}, \\ &= \frac{2\sqrt{(2-\mu)\mu(-\mu-2(1-\mu)m+2)(\mu+2(1-\mu)m)}}{\sqrt{(2-\mu)(-\mu-2(1-\mu)m+2)} + \sqrt{\mu(\mu+2(1-\mu)m)}}, \end{aligned} \quad (\text{B.41b})$$

858 according to Mathematica (Wolfram Research, Inc., 2015) (isn't this amazing?).  
859 Here as well, the integral does not converge when  $\mu \rightarrow 0$ . Finally, we compute  
860 probabilities of identity by descent using eq. (B.39a), and obtain eq. (29) in the  
861 main text for neighbors on the the circle ( $q = 1$ ).

## Appendix C

---

### 862 **C Derivatives of $B_{ij}$ and $D_j$ for specific life-cycles**

#### 863 **Birth-Death updating**

864 With a Moran Birth-Death updating rule (see eq. (14)), the derivatives of  $B_{ij}$  and

865  $D_j$  with respect to  $f_k$  are

$$\left. \frac{\partial B_{ij}}{\partial f_k} \right|_{\delta=0} = \frac{d_{ji} \delta_{j,k} N - 1}{v N^2}, \quad (\text{C.1a})$$

$$\left. \frac{\partial D_j}{\partial f_k} \right|_{\delta=0} = \frac{d_{kj}}{Nv} - \frac{1}{N^2}, \quad (\text{C.1b})$$

866 with

$$\delta_{j,k} = \begin{cases} 1 & \text{when } j = k, \\ 0 & \text{otherwise.} \end{cases} \quad (\text{C.2})$$

867 Consequently,

$$\left. \frac{\partial W_j}{\partial f_k} \right|_{\delta=0} = \frac{\delta_{j,k}}{N} - \frac{d_{kj}}{Nv}. \quad (\text{C.3})$$

#### 868 **Death-Birth updating**

869 With a Moran Death-Birth updating rule (see eq. (19)), the derivatives of  $B_{ij}$  and

870  $D_j$  with respect to  $f_k$  are given by the following equations:

$$\left. \frac{\partial B_{ij}}{\partial f_k} \right|_{\delta=0} = \frac{\delta_{k,j} d_{ki} v - d_{ji} d_{ki}}{Nv^2}, \quad (\text{C.4a})$$

$$\left. \frac{\partial D_j}{\partial f_k} \right|_{\delta=0} = 0, \quad (\text{C.4b})$$

## Appendix C

---

871 with  $\delta_{k,j}$  as defined in eq. (C.2). As a result,

$$\frac{\partial W_j}{\partial f_k} \Big|_{\delta=0} = \frac{\delta_{k,j}}{N} - \sum_{i=1}^N \frac{d_{ji}d_{ki}}{Nv^2}. \quad (\text{C.5})$$

### 872 **Wright-Fisher updating**

873 With a Wright-Fisher updating rule (see eq. (22)), the derivatives of  $B_{ij}$  and  $D_j$

874 with respect to  $f_k$  are

$$\frac{\partial B_{ij}}{\partial f_k} \Big|_{\delta=0} = \frac{\delta_{k,j}d_{ki}v - d_{ji}d_{ki}}{v^2}, \quad (\text{C.6a})$$

$$\frac{\partial D_j}{\partial f_k} \Big|_{\delta=0} = 0. \quad (\text{C.6b})$$

875 with  $\delta_{k,j}$  as defined in eq. (C.2). Finally,

$$\frac{\partial W_j}{\partial f_k} \Big|_{\delta=0} = \delta_{k,j} - \sum_{i=1}^N \frac{d_{ji}d_{ki}}{v^2}. \quad (\text{C.7})$$

## Appendix C

### 876 Figures

### 877 Figure 1

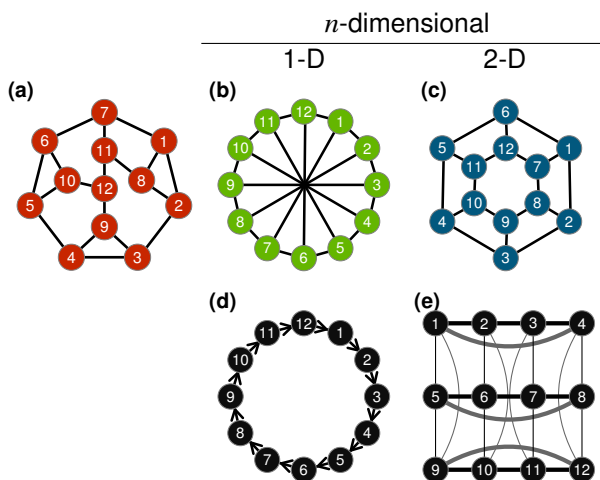

**Figure 1:** Examples of regular graphs of size 12. The graphs on the first line are unoriented and unweighted graphs of degree  $\nu = 3$ ; Graph (d) is oriented, graph (e) is weighted. (a) is the Frucht graph, and has no symmetry. Graphs (b) and (d) are one-dimensional, graphs (c) and (e) are two-dimensional (see main text).

## Appendix C

878 **Figure 2**

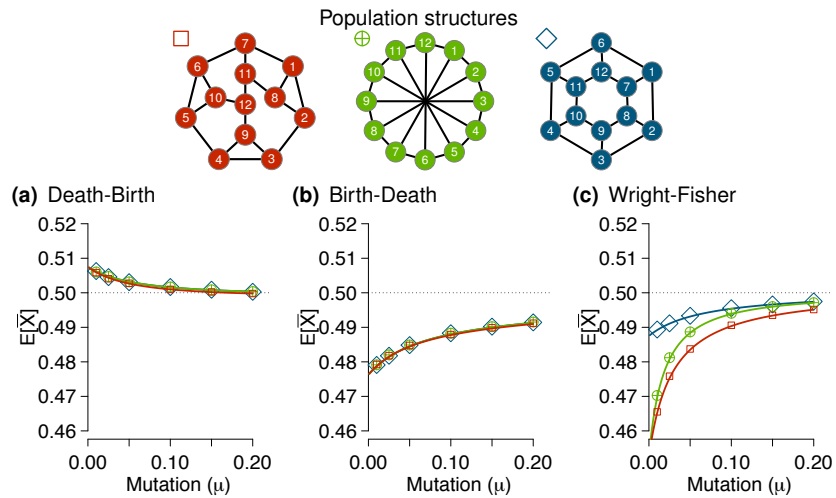

**Figure 2:** Expected frequency of type-A individuals  $\mathbb{E}[\bar{X}]$ , depending on population structure (legend on the first line), updating rule ((a): Moran Death-Birth, (b): Moran Birth-Death, (c): Wright-Fisher), and mutation probability  $\mu$  (horizontal axis): Comparison between the theoretical prediction (curves) and the outcomes of numerical simulations (points). The horizontal dotted gray line corresponds to  $p$ , the expected frequency of type-A individuals when there is no selection (*i.e.*, when  $\delta = 0$ ). Other parameters:  $\delta=0.005$ ,  $p = 1/2$ .

## Appendix C

879 **Figure 3**

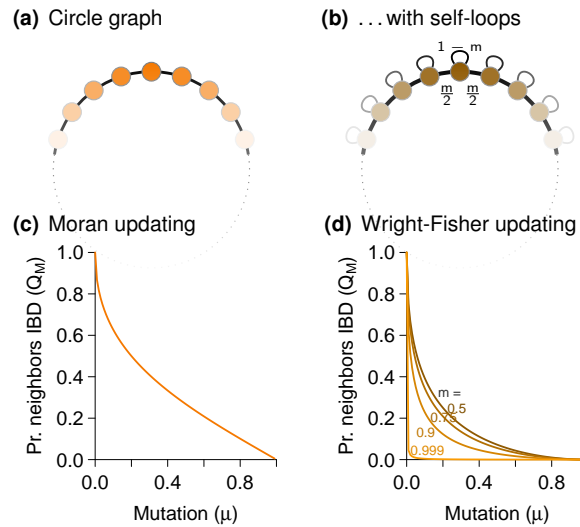

**Figure 3:** Circle graphs, without (a) or with self-loops ((b); the weight of the self-loop is  $1 - m$ ), and Probability that two neighbors on the graph are identical by descent, as function of the mutation probability  $\mu$ , for the Moran updating on an infinite circle graph (c), and for the Wright-Fisher updating on an infinite circle graph with self loops (d). In (d), emigration probabilities  $m$  take values 0.5, 0.75, 0.9, 0.999 (increasingly lighted curves).
